## Perturbation of effector and regulatory T cell subsets in Myalgic Encephalomyelitis/Chronic Fatigue Syndrome (ME/CFS)

1 Ece Karhan<sup>1#</sup>, Courtney L Gunter<sup>1#</sup>, Vida Ravanmehr<sup>1</sup>, Meghan Horne<sup>1</sup>, Lina Kozhaya<sup>1</sup>,  
2 Stephanie Renzullo<sup>1</sup>, Lindsey Placek<sup>1</sup>, Joshy George<sup>1</sup>, Peter N Robinson<sup>1</sup>, Suzanne D  
3 Vernon<sup>2</sup>, Lucinda Bateman<sup>2</sup>, and Derya Unutmaz<sup>1,3\*</sup>

4 <sup>1</sup>Unutmaz Laboratory, Jackson Laboratory for Genomic Medicine, Farmington, Connecticut,  
5 USA

6 <sup>2</sup>Bateman Horne Center, Salt Lake City, Utah, USA

7 <sup>3</sup>Department of Immunology, University of Connecticut School of Medicine, Farmington,  
8 Connecticut, USA

9 \* Correspondence:

10 Derya Unutmaz

11 [derya@mac.com](mailto:derya@mac.com)

12

13 **Words:** 6120

14 **Figures and Tables:** 10

15 **Keywords:** ME/CFS, MAIT cells, Th17 cells, biomarker, machine learning

16

17 **Abstract**

18

19 Myalgic encephalomyelitis/chronic fatigue syndrome (ME/CFS) is a debilitating disorder of  
20 unknown etiology, and diagnosis of the disease is largely based on clinical symptoms. We  
21 hypothesized that immunological disruption is the major driver of this disease and analyzed a  
22 large cohort of ME/CFS patient or control blood samples for differences in T cell subset  
23 frequencies and functions. We found that the ratio of CD4+ to CD8+ T cells and the proportion  
24 of CD8+ effector memory T cells were increased, whereas NK cells were reduced in ME/CFS  
25 patients younger than 50 years old compared to a healthy control group. Remarkably, major  
26 differences were observed in Th1, Th2, Th17 and mucosal-associated invariant T (MAIT) T cell  
27 subset functions across all ages of patients compared to healthy subjects. While CCR6+ Th17  
28 cells in ME/CFS secreted less IL-17 compared to controls, their overall frequency was higher.  
29 Similarly, MAIT cells from patients secreted lower IFN $\gamma$ , GranzymeA and IL-17 upon  
30 activation. Together, these findings suggest chronic stimulation of these T cell populations in  
31 ME/CFS patients. In contrast, the frequency of regulatory T cells (Tregs), which control  
32 excessive immune activation, was higher in ME/CFS patients. Finally, using a machine learning  
33 algorithm called random forest, we determined that the set of T cell parameters analyzed could  
34 identify more than 90% of the subjects in the ME/CFS cohort as patients (93% true positive rate  
35 or sensitivity). In conclusion, these multiple and major perturbations or dysfunctions in T cell  
36 subsets in ME/CFS patients suggest potential chronic infections or microbiome dysbiosis. These  
37 findings also have implications for development of ME/CFS specific immune biomarkers and  
38 reveal potential targets for novel therapeutic interventions.

39

## 40 **Introduction**

41

42 Myalgic encephalomyelitis/chronic fatigue syndrome (ME/CFS) is a highly debilitating illness  
43 often characterized by symptoms such as post-exertional malaise or severe fatigue not alleviated  
44 by rest, muscle and joint pain, sleep problems, hypersensitivity to sensory stimuli, and  
45 gastrointestinal symptoms (Holgate et al., 2011; Yancey and Thomas, 2012; Basted and Marshall,  
46 2015). ME/CFS is thought to afflict up to two million individuals in the US alone, with severe  
47 long-term disability and negative impacts on quality of life (Valdez et al., 2018). The specific  
48 cause and biological basis of ME/CFS remain elusive. Lack of understanding of biological  
49 pathways leading to this syndrome is also a major impediment in developing specific therapies  
50 and reliable biomarker-based diagnostic tests (Klimas et al., 2012).

51

52 While the causes of ME/CFS are likely to be multifactorial, a common history of initial  
53 infectious agents, including viral (e.g. EBV) and bacterial (e.g. Lyme Disease) infections, have  
54 been associated with triggering the disease (Hickie et al., 2006; Katz et al., 2009). Indeed,  
55 mounting evidence in ME/CFS patients implicates a significant role for immunological  
56 abnormalities that are thought to contribute to disease progression and/or maintenance of the  
57 chronic symptomatic state (Fletcher et al., 2010; Brenu et al., 2012; Curriu et al., 2013; Brenu et  
58 al., 2014; Mensah et al., 2017). Studies of the immune system of ME/CFS subjects have revealed  
59 many abnormalities, including disruptions in the number and function of T cell subsets, B cell  
60 and natural killer (NK) cells (Fletcher et al., 2010; Brenu et al., 2012; Curriu et al., 2013; Brenu et  
61 al., 2014); changes in T-cell or innate cell cytokine secretion (Torres-Harding et al.,  
62 2008; Broderick et al., 2010; Bansal et al., 2012); changes in humoral immunity (Prinsen et al.,  
63 2012) and inflammatory immune signaling (Aspler et al., 2008); and higher frequencies of  
64 various autoantibodies (Ortega-Hernandez and Shoenfeld, 2009). In particular, T cells are  
65 responsible for orchestrating and modulating an optimal immune response, either through their  
66 effector or regulatory functions. Thus, perturbations in T cell subsets or in effector or regulatory  
67 functions during ME/CFS (Lorusso et al., 2009; Rivas et al., 2018) can result in an immune  
68 disruption or unwanted immune responses.

69

70 Here we found perturbations in CD8+ T cells, NK cells, Treg cell frequencies and effector  
71 functions of Th17 and MAIT cells in ME/CFS patients. Some of the immune parameter  
72 differences, such as CD8+ effector memory T cells and NK cells, were relatively different in  
73 younger patients, but not in patients older than 50 years, when compared to healthy controls. In  
74 addition, using significant immune features and a machine learning algorithm, we could identify  
75 ME/CFS patients among healthy controls with very high sensitivity and specificity. Together,  
76 our findings reveal multiple chronic T cell dysfunctions in ME/CFS, suggesting a link to chronic  
77 infections or a disruption of the microbiota.

78

## 79 **Materials and Methods**

80

### 81 **Participants**

82

83 All subjects were recruited at Bateman Horne Center, Salt Lake City, UT, based on were who  
84 met the 1994 CDC Fukuda (Fukuda et al., 1994) and/or Canadian consensus criteria for ME/CFS

85 (Carruthers, 2007). Healthy controls were frequency-matched to cases on age, sex, race/ethnicity,  
86 geographic/clinical site and season of sampling. Patients or controls taking antibiotics or had any  
87 infections in the prior months; taking any immunomodulatory medications were excluded from  
88 the study. The study was approved by Western IRB (Protocol number 20151965) and written  
89 informed consent and verbal assent when appropriate were obtained from all participants in this  
90 study. We enrolled a total of 198 ME/CFS patients and 91 healthy controls. Subject  
91 characteristics are shown in supplementary Table 1.

92

### 93 **PBMC isolation and preservation**

94

95 Healthy and patient blood samples are obtained from Bateman Horne Center, Salt Lake City, UT  
96 and approved by Western IRB. Heparinized blood samples were shipped overnight at room  
97 temperature. Peripheral blood mononuclear cells (PBMC) were then isolated using Ficoll-paque  
98 plus (GE Health care) and cryopreserved in liquid nitrogen.

99

### 100 **Surface and intracellular staining and flow cytometry analysis**

101

102 After thawing, PBMCs were counted and divided into 2 parts, 1 part for day 0 surface staining,  
103 and the other part cultured in complete RPMI 1640 medium (RPMI plus 10% Fetal Bovine  
104 Serum (FBS, Atlanta Biologicals) and 1% penicillin/streptomycin (Corning Cellgro)  
105 supplemented with IL-2+IL15 (20ng/ml) for Treg subsets day 1 surface and transcription factors  
106 staining, IL-7 (20ng/ml) for day 1 and day 6 intracellular cytokine staining and a combination of  
107 cytokines (20ng/ml IL-12, 20ng/ml IL-15, and 40ng/ml IL-18) for day 1 intracellular cytokine  
108 staining (IL-12 from R&D, IL-7 and IL-15 from Biolegend).

109

110 Surface staining was performed in staining buffer containing PBS + 2% FBS for 30 minutes at  
111 4°C. When staining for chemokine receptors the incubation was done at room temperature.  
112 Antibodies used in the surface staining are CD3 (UCHT1 clone, Alexa Fluor 532, eBioscience),  
113 CD4 (OKT4 clone, Brilliant Violet 510), CD8 (RPA-T8 clone, Pacific Blue or Brilliant Violet  
114 570), CD19 (HIB19 clone, Brilliant Violet 510), CD45RO (UCHL1 clone, Brilliant Violet 711,  
115 APC/Cy7, or Brilliant Violet 570), CCR7 (G043H7 clone, Alexa Fluor 488), 2B4 (C1.7 clone,  
116 PerCP/Cy5.5), CD14 (HCD14 clone, Alexa Fluor 700), CD27 (O323 clone, PE/Cy7, Brilliant  
117 Violet 605, or Alexa Fluor 647), CCR6 (G034E3 clone, Brilliant Violet 605), CD161 (HP-3G10,  
118 Brilliant Violet 421), V $\alpha$ 7.2 (3C10 clone, PE) (all from Biolegend).

119

120 For intracellular cytokine staining, cells were stimulated with PMA (40ng/ml for overnight  
121 cultured cells and 20ng/ml for 6 days cultured cells) and Ionomycin (500ng/ml) (both from  
122 Sigma-Aldrich) in the presence of GolgiStop (BD Biosciences) for 4 hours at 37°C. For cytokine  
123 secretion after stimulation with IL-12+IL-15+IL-18+, GolgiStop was added to the culture on day  
124 1 for 4 hours. Stimulated or unstimulated cells were collected, stained with surface markers  
125 including CD3, CD4, CD8, CD161, V $\alpha$ 7.2, CD45RO, CCR6, and CD27 (Biolegend) followed  
126 by one wash with PBS (Phosphate buffer Saline) and staining with fixable viability dye  
127 (eBioscience). After surface staining, cells were fixed and permeabilized using  
128 fixation/permeabilization buffers (eBioscience) according to the manufacturer's instruction.  
129 Permeabilized cells were then stained for intracellular IFN $\gamma$  (4S.B3 clone, APC/Cy7), TNF $\alpha$   
130 (Mab11 clone, PE/Dazze 594), GranzymeA (CB9 clone, Alexa Fluor 647, Alexa Fluor 488), IL-

131 17A (BL168 clone, Alexa Fluor 488, Brilliant Violet 421), Foxp3 (259D clone, PE), and Helios  
132 (22F6 clone, Alexa Fluor 488) (all from Biolegend). Flow cytometry analysis was performed on  
133 SP6800 spectral cell analyzer (Sony Biotechnology) and analyzed using FlowJo (Tree Star).

134

### 135 **Machine learning and statistical analysis**

136

137 All statistical analyses were performed using GraphPad Prism V8 software. Continuous variable  
138 datasets were analyzed by Mann-Whitney U test for non-parametric datasets when comparing  
139 clinical groups, and exact P values are reported. Spearman  $\rho$  was used to determine the  
140 relationship existing between two sets of data between non-parametric datasets.

141

142 The algorithms for identifying significantly different features and the RF classifier were  
143 implemented in Python 3.6.8 using Jupyter Notebook 5.0.0. The RF classifier was performed  
144 with different numbers of features of  $k = 65, 40, 10$ . A training set with 231 samples (80% of  
145 total samples) was selected and the remaining data corresponding to 58 samples (20% of total  
146 samples) was left as the test set. Missing values in the training and test sets were replaced by  
147 corresponding median value in the training set. The RF classifier was implemented using a 3-  
148 fold (stratified) cross validation and was trained using all 65 immune profile features, the 40  
149 significantly different features, the top 10 significantly different features and the top 10 features  
150 among the 40 significantly different features that received the highest importance score.

151

152 There are several metrics to evaluate the performance of a classifier. Sensitivity represents the  
153 proportion of patients who were correctly identified as patients and specificity represents the  
154 proportion of healthy controls who were correctly identified as healthy. If patients are denoted by  
155 “positives” and healthy controls by “negatives”, then sensitivity and specificity are calculated as:

156

$$157 \text{ sensitivity} = \frac{\text{Number of true positives}}{\text{Number of positives}} \text{ and specificity} = \frac{\text{Number of true negatives}}{\text{Number of negatives}}$$

158

159 where “true positives” refer to patients who were correctly identified as patients and “true  
160 negatives” refer to healthy controls who were correctly identified as healthy.

161 Accuracy is a metric which shows the fraction of predictions that our classifier predicted  
162 correctly. Accuracy is calculated in terms of true positives and true negatives as:

163

$$\text{Accuracy} = \frac{\text{Number of true positives} + \text{Number of true negatives}}{\text{Total number of predictions}}$$

164

165 Positive (negative) predictive values are the proportion of positives (negatives) that are correctly  
166 identified as positives (negatives which are calculated as:

167

$$\text{Positive predictive value} = \frac{\text{Number of true positives}}{\text{Number of true positives} + \text{Number of false positives}}$$

168

$$\text{Negative predictive value} = \frac{\text{Number of true negatives}}{\text{Number of true negatives} + \text{Number of false negatives}}$$

169

170 The  $F_1$  score measures the accuracy of test by calculating the (harmonic) mean of the sensitivity  
171 (recall) and positive predictive value (precision). The  $F_1$  score is defined as:

$$F_1 = 2 \times \frac{\text{precision} \times \text{recall}}{\text{precision} + \text{recall}}$$

173

174

## 175 **Results**

176

### 177 **Changes in T cells subsets in ME/CFS patient blood**

178

179 To determine phenotypic and functional changes in immune cell subsets from ME/CFS patients,  
180 we developed several staining panels for flow cytometry analysis and performed immune  
181 profiling of 198 ME/CFS patients and 91 age- and sex- matched healthy controls (Supplemental  
182 Table 1). We first analyzed the main immune subsets in peripheral blood mononuclear cells  
183 (PBMCs), namely T cells, B cells, NK cells, and monocytes (Figure 1a, 1b). There was no  
184 significant difference in the percentage of overall monocytes ( $p=0.9$ ), B cells ( $p=0.9$ ) or T cells  
185 ( $p=0.1$ ) (Fig. 1a, 1b), but the frequency of NK cells within lymphocytes was greatly reduced  
186 ( $p=0.0005$ ) in ME/CFS compared to healthy controls (Fig. 1b). Within T cells, we observed that  
187 CD4+ T cell frequency was higher ( $p=0.0193$ ) and correspondingly, CD8+ T cells were lower  
188 ( $p=0.0052$ ) in ME/CFS subjects, and that this was reflected as a higher CD4 to CD8 ratio  
189 ( $p=0.0078$ ) in patients (Fig. 1c). There was no difference in CD4- CD8- (double negative; DN)  
190 T cells ( $p=0.9$ ) between controls and ME/CFS patients (data not shown).

191

192 It is well established that CD4 to CD8 ratio changes are associated with aging (Yan et al.,  
193 2001; Yan et al., 2010; Serrano-Villar et al., 2014; Adriaensen et al., 2015). Indeed, CD4+ and  
194 CD8+ T cell frequencies and the CD4 to CD8 ratio correlated with age in both healthy controls  
195 ( $r_s=0.4902$ ,  $-0.4649$ , and  $0.4794$  respectively) and in ME/CFS subjects ( $r_s=0.4531$ ,  $-0.4305$ , and  
196  $0.4403$ , respectively) (Fig. 1d). Age also showed a significant correlation with DN T cells for  
197 controls ( $r_s=-0.4384$ ), but not for ME/CFS patients ( $r_s=-0.2235$ ) (Fig. 1d). Interestingly, when  
198 we subdivided ME/CFS patients around their median age, as younger or older than 50 years of  
199 age, the difference in the percentage of CD8+ T cells and the CD4:CD8 ratio remained  
200 significant only for ME/CFS subjects younger than 50 years ( $p=0.0082$  and  $0.0131$ ,  
201 respectively), but not for those older than 50 years ( $p=0.6$  and  $0.6$ , respectively) (Fig. 1e). Age  
202 also showed a significant correlation with NK cells only in ME/CFS patients ( $r_s=0.3531$ ), but not  
203 in healthy controls ( $r_s=0.02794$ ) (Fig. 1f). This change in NK cell frequency was also only seen  
204 in ME/CFS subjects younger than 50 years ( $p<0.0001$ ) (Fig. 1g).

205

206 We next divided CD4+ and CD8+ T cells into naïve and memory subsets as part of their  
207 differentiation states, based on their functional and phenotypic features (Sallusto et al., 2004). To  
208 determine the proportion of these subsets in ME/CFS patients, we used well-established  
209 CD45RO and CCR7 cell surface molecules as markers for both CD4+ and CD8+ T cell subsets  
210 (Fig. 2a). Within CD4+ T cells, there was no significant difference between ME/CFS patients  
211 and healthy controls for CD45RO-CCR7+ (naïve; N) ( $p=0.5$ ), CD45RO+CCR7+ (central  
212 memory; CM) ( $p=0.7$ ), CD45RO+CCR7- (effector memory; EM) ( $p=0.2$ ), or CD45RO-CCR7-  
213 (effector memory RA; EMRA) ( $p=0.06$ ) subsets (Fig. 2b). There was also no difference in CD8+



214 N ( $p=0.4$ ), CM ( $p=0.1$ ), or EMRA (0.0509) populations, however, the CD8+ EM T cell subset  
215 was greatly increased as a proportion of CD8+ T cells ( $p=0.0001$ ) in ME/CFS patients (Fig. 2c).

216  
217 The frequencies of N, CM, EM, and EMRA populations within CD8+ T cells correlated with age  
218 for both healthy controls ( $r_s=-0.5259$ , 0.5222, 0.3696, and 0.3602 respectively) and ME/CFS  
219 patients ( $r_s=-0.6162$ , 0.3756, 0.3814, and 0.5172 respectively) (Fig. 2d), and this was also seen  
220 in CD4+ subsets (Supplemental Fig. 1a). However, there was no significant difference between  
221 ME/CFS patients and healthy controls for CD8+ N or CM T cells for subjects who were younger  
222 or older than 50 years ( $p=0.8$  and 0.07, respectively) (Fig. 2d) or for CD4+ N, CM or EM subsets  
223 in different age groups of patients and controls (Supplemental Fig. 1b). Interestingly, the CD8+  
224 EM subset difference between ME/CFS patients and healthy controls was restricted to subjects  
225 younger than 50 years ( $p=0.0027$ ) (Fig. 2e). CD8+ and CD4+ EMRA subsets were also only  
226 significantly lower in ME/CFS patients who were younger than 50 years of age ( $p<0.0001$  and  
227  $p<0.0156$  respectively) (Fig. 2e and Supplemental Fig. 1b).

228

### 229 **Changes in Th17 cell frequency and function in ME/CFS disease**

230  
231 We hypothesized that ME/CFS patients may also have disruptions within effector T cell subsets  
232 resident in mucosal tissues such as Th17 cells, which respond to bacterial infections or  
233 microbiota and are also linked to autoimmune diseases (Milner et al., 2010; Pandiyan et al.,  
234 2019). To identify Th17 cells we first used CD3, CD4, CD45RO, and CCR6 expression (Fig.  
235 3a), as almost all of this subset has a memory phenotype and also expresses the chemokine  
236 receptor CCR6 (Romagnani et al., 2009). In order to analyze the cytokine secretion from T cells,  
237 we thawed frozen aliquots of PBMC and cultured one day in IL-7 (d1) to ensure cells recovered  
238 from thawing and any dying cells could be clearly identified. We then activated the cells with  
239 PMA and Ionomycin as described in methods. The cells were then stained intracellularly for IL-  
240 17 and IFN $\gamma$  and gated on cell surface expression based on CD4+CD45RO+CCR6+ and  
241 CD4+CD45RO+CCR6- cells (Fig. 3b), as previously described (Wan et al., 2011). Within the  
242 CD4+CD45RO+ (memory T cell) population, the frequency of IL-17+ ( $p=0.0378$ ), IFN $\gamma$ +  
243 ( $p=0.0231$ ), and IL-17+IFN $\gamma$ + ( $p=0.0378$ ) secreting cells was significantly reduced in ME/CFS  
244 compared to healthy subjects (Fig. 3c).

245  
246 Previously we have shown that a portion of Th17 cells are poised to produce IL-17 or IL-22 only  
247 after priming with  $\gamma$ c-cytokines (namely IL-2, IL-15 or IL-7) in culture, which reveal their full  
248 potential of their IL-17 secretion (Wan et al., 2011). Accordingly, we cultured PBMC from  
249 ME/CFS patients and control subjects for 6 days (d6) in IL-7 to prime Th17 cells for IL-17  
250 secretion, as previously described (Wan et al., 2011). PBMC were then stimulated using PMA  
251 and Ionomycin, and expression of cytokines within T cell subsets was determined. In this assay,  
252 T cells from ME/CFS patients expressed profoundly lower total IL-17+ ( $p<0.0001$ ), IFN $\gamma$   
253 ( $p<0.0001$ ), IL-17+IFN $\gamma$ + ( $p<0.0001$ ), and IL-17+IFN $\gamma$ - ( $p<0.0001$ ) cells (Fig. 3d), revealing a  
254 major dysfunction of Th17 cells in patients.

255  
256 After 6 days in culture with IL-7, the proportion of IL-17 and IFN $\gamma$  secreting cells within  
257 CD4+CD45RO+ memory population of healthy controls did not correlate with age for either IL-  
258 17+, IFN $\gamma$ +, IL-17+IFN $\gamma$ +, or IL-17+IFN $\gamma$ - subsets ( $r_s=-0.2379$ , -0.2929, -0.2413, and -0.2719  
259 respectively). For ME/CFS patients, age also did not correlate with IFN $\gamma$ + expressing cells ( $r_s=-$

260 0.2929), but IL-17+, IL-17+IFN $\gamma$ +, and IL-17+IFN $\gamma$ - subsets showed a significant correlation  
261 ( $r_s$ =-0.4073, -0.3952, and -0.3784, respectively) (Fig. 3e). When patients were broken down into  
262 groups of subjects younger and older than 50 years, significant differences were observed in IL-  
263 17+, IFN $\gamma$ +, IL-17+IFN $\gamma$ +, and IL-17+IFN $\gamma$ - subsets between controls and ME/CFS subjects  
264 younger than 50 years ( $p$ =0.0017, 0.0018, 0.0009, and 0.0009, respectively), as well as among  
265 the older than 50 years groups ( $p$ =0.0002, 0.0047, 0.0008, and 0.0001, respectively) (Fig. 3f).

266  
267 To further investigate the disruption in the Th17 cell subset, we compared the frequency of  
268 CD4+CD45RO+CCR6+ cells between controls and ME/CFS patients. In contrast to IL-17  
269 expression, we found that CCR6+ cells were significantly higher in ME/CFS patients  
270 ( $p$ =0.0009). However, after 6 days in IL-7, there was no difference between the subject groups  
271 ( $p$ =0.2), even though the average frequency was higher in both groups (Fig. 4a). CCR6+ cell  
272 frequency within memory CD4 T cells correlated with subject age for healthy controls  
273 ( $r_s$ =0.3206), but not for ME/CFS patients ( $r_s$ =0.2071). When patients were grouped as younger  
274 and older than 50 years of age, a significant difference was seen for the proportion of CCR6+  
275 cells only in subjects younger than 50 years ( $p$ =0.0002) (Fig. 4b).

276  
277 Remarkably, ME/CFS subjects, compared to controls, displayed lower expression of IL-17+  
278 ( $p$ =0.0035), IL-17+IFN $\gamma$ + ( $p$ =0.0055), and IL-17+IFN $\gamma$ - ( $p$ =0.0084), but not total IFN $\gamma$ + ( $p$ =0.3),  
279 within the CD4+CD45RO+CCR6+ T cells (Fig. 4c). After 6 days in culture in IL-7, the  
280 differences further increased and were seen in all cytokine-secreting cells, as a proportion of  
281 CD4+CD45RO+CCR6+ T cells, for IL-17+ ( $p$ <0.0001), IFN $\gamma$ + ( $p$ =0.0010), IL-17+IFN $\gamma$ +  
282 ( $p$ <0.0001), and IL-17+IFN $\gamma$ - ( $p$ <0.0001) cells (Fig. 4d).

283  
284 We next determined the ratio between the CCR6+ T cells to CD4+ memory T cells expressing  
285 IL-17 or IFN $\gamma$ . Indeed, the ratio of CCR6+ cells to IL-17+ ( $p$ <0.0001) and to IFN $\gamma$ + ( $p$ <0.0001)  
286 CD4+ memory T cells were significant in ME/CFS patients compared to healthy controls (Fig.  
287 4e). These ratios between CCR6+ cells and cytokines produced by CD4+ cells also remained  
288 higher in ME/CFS subjects after d6 in IL-7, for CCR6+ to IL-17+ cell ratio ( $p$ =0.0015), but were  
289 only marginally different for CCR6+ to IFN $\gamma$ + cell ratio ( $p$ =0.0366) (Fig. 4f).

290  
291 We have previously shown that CD161 within the CD4+CD45RO+CCR6+ T cells can further  
292 divide these cells into subsets with differences in IL-17 and IFN $\gamma$  secretion (Wan et al., 2011).  
293 As such, we further divided CCR6+ cells based on CD161 expression (Fig. 5a). The proportion  
294 of CD161+ cells within the CCR6+ subset was only slightly different in ME/CFS compared to  
295 controls ( $p$ =0.0439) (Fig. 5a). We then analyzed IL-17 and IFN $\gamma$  expression within the CD161+  
296 and CD161- subsets of CD4+ CD45RO+ CCR6+ cells after 6 days in culture (Fig. 5b). Within  
297 the CD4+CCR6+CD161+ cells, there was a significant difference in expression of IL-17+, IL-  
298 17+IFN $\gamma$ +, and IL-17+IFN $\gamma$ - cells between ME/CFS and controls ( $p$ <0.0001 for all), but not for  
299 IL-17-IFN $\gamma$ + cells ( $p$ =0.06) (Fig. 5c). CD161- cells within the CD4+CD45RO+CCR6+ subset  
300 also displayed lower IL-17+, IL-17+IFN $\gamma$ +, IL-17+IFN $\gamma$ -, and IL-17-IFN $\gamma$ + in ME/CFS subjects  
301 compared to healthy controls ( $p$ =<0.0001, <0.0001, 0.0001, and 0.0042, respectively), (Fig. 5d).

302  
303 In CD4+ memory T cells, in addition to IL-17 expression, we also determined the frequency of T  
304 cells that were either expressing IFN $\gamma$  (IFN $\gamma$ +IL-4-) or IL-4 (IFN $\gamma$ -IL-4+) only, which  
305 respectively define Th1 and Th2 T cell subsets (Fig. 5e). We found that the proportion of

306 IFN $\gamma$ +IL-4- and IFN $\gamma$ -IL-4+ within CD4+ memory T cells was significantly lower ( $p=0.0157$   
307 and  $p<0.0001$  respectively) in ME/CFS subjects (Fig. 5e). However, the ratio of Th1 (IFN $\gamma$ +IL-  
308 4-) to Th2 (IFN $\gamma$ -IL-4+) was higher in ME/CFS patients compared to the control group  
309 ( $p=0.0196$ ) (Fig. 5b), suggesting an imbalance of Th1 to Th2 cells. Together, these findings  
310 highlight major functional perturbations within the CD4+ T cell subset in the ME/CFS patient  
311 cohort.

312

### 313 **Changes in Frequency of MAIT cells in ME/CFS**

314

315 Mucosal-associated invariant T (MAIT) cells are a subset of the non-classical T cell population  
316 and defined by an invariant T cell receptor that is triggered by riboflavin metabolites produced  
317 by bacteria, including commensal microbiota (Tastan et al., 2018; Godfrey et al., 2019). Similar  
318 to the Th17 subset, we hypothesized that dysbiosis in the gut microbiome or prior bacterial  
319 infections may result in changes in MAIT cell frequencies or function. To identify MAIT cells in  
320 PBMC, we used V $\alpha$ 7.2 and CD161 surface molecules as previously described (Khaitan et al.,  
321 2016; Tastan et al., 2018). We then determined the frequency of MAIT cells within CD4+, CD8+  
322 and CD4-CD8- (double negative or DN) T cell compartments in ME/CFS patients and healthy  
323 controls (Fig. 6a). There was no significant difference between patients and controls for CD4+  
324 ( $p=0.7$ ), CD8+ ( $p=0.7$ ), or double negative (DN) MAIT cells ( $p=0.2$ ) as a proportion of the  
325 CD4+, CD8+ and DN T cells respectively (Fig. 6b). However, CD4+ and CD8+ MAIT cell  
326 frequencies in PBMC after 6-day culture in IL-7 showed a significant difference ( $p=0.0250$  and  
327  $p=0.0221$  respectively) between ME/CFS patients and controls, but DN MAIT cell frequency did  
328 not change between ME/CFS and control samples after 6 days culture ( $p=0.3$ ) (Fig. 6c). When  
329 the ratio of MAIT cell frequency at day 0 (d0) vs day 6 after IL-7 culture (d6) was assessed, we  
330 found that the frequency of CD8+ MAIT cells in ME/CFS PBMC was greatly reduced after 6  
331 days of culture compared to d0 levels ( $p=0.0008$ ), but there was no significant difference seen  
332 for CD4+ ( $p=0.06$ ) or for DN MAIT cells ( $p=0.8$ ) between ME/CFS patients and controls (Fig.  
333 6d). Corollary to this finding, the ratio of CD8+ MAIT to DN MAIT cells in ME/CFS patients  
334 and controls was only slightly significant at d0 ( $p=0.0364$ ), but became highly significant after 6  
335 days in culture with IL-7 ( $p<0.0001$ ) (Fig. 6e). Together, these findings suggest that CD8+  
336 MAIT cells from ME/CFS subjects survived less in in vitro culture with IL-7.

337

338 Because CD27 expression on MAIT cells could indicate a recently activated or differentiated  
339 subset, similar to other CD8 T cells (Dolfi and Katsikis, 2007; Grant et al., 2017), we evaluated  
340 CD27 expression in MAIT subsets (Fig. 6f). We found that ME/CFS patients had a significant  
341 difference where there were higher CD45RO+CD27- cells compared to the control group  
342 ( $p=0.0045$ ), but interestingly, this difference was not observed within DN MAIT cells ( $p=0.7$ )  
343 (Fig. 6g). The d0 to d6 CD8+ MAIT cell ratio also displayed a slight positive correlation with the  
344 frequency of CD27-CD8+ MAIT cells in patients ( $r_s=0.2920$ ), but not in healthy controls  
345 ( $r_s=0.2519$ ). In contrast, CD27- DN MAIT cells did not correlate with the d0 to d6 cell  
346 frequency ratio for either controls ( $r_s=0.1597$ ), or ME/CFS patients ( $r_s=0.1016$ ) (Fig. 6h).

347

348 We then asked to what extent MAIT cells were functionally different between ME/CFS patients  
349 and controls. For this approach we first stimulated the PBMC with a cocktail of three cytokines,  
350 namely IL-12+IL-15+IL18, since this combination has been uniquely shown to induce  
351 expression of IFN $\gamma$  from MAIT cells (Ussher et al., 2014; Salou et al., 2017). Accordingly, IFN $\gamma$



352 along with Granzyme A expression was used to evaluate the response of CD8+ MAIT and CD8+  
353 non-MAIT cells in PBMC to stimulation with IL-12+IL-15+IL18 cocktail (Fig. 7a). ME/CFS  
354 patient PBMC stimulated with the cytokine cocktail showed much lower IFN $\gamma$ + MAIT cells  
355 ( $p < 0.0001$ ), but induction of IFN $\gamma$ + from non-MAIT CD8+ T cells was comparable ( $p = 0.1$ ) to  
356 healthy subjects (Fig. 7b). Granzyme A expressing MAIT cells were also much higher in  
357 ME/CFS subjects ( $p < 0.0001$ ), but non-MAIT cells expressing Granzyme A were not different  
358 ( $p = 0.8$ ) between controls and patients (Fig. 7c). In addition, CD27-CD8+ MAIT cells and IFN $\gamma$ +  
359 MAIT cells upon cytokine stimulation were negatively correlated in ME/CFS patients ( $r_s =$   
360  $-0.3431$ ) but not in controls ( $r_s = -0.2112$ ) (Fig. 7d). CD27-CD8+ MAIT cells were not correlated  
361 with CD8+ non-MAIT IFN $\gamma$ + cells for either healthy controls ( $r_s = -0.1370$ ) or ME/CFS patients  
362 ( $r_s = -0.09816$ ) (Fig. 7d).

363  
364 Since MAIT cells have also been shown to express IL-17, similar to Th17 cells (Salou et al.,  
365 2017), we next sought to determine the production of IL-17 and IFN $\gamma$  from MAIT cells in  
366 response to PMA and Ionomycin stimulation. There was very little to undetectable IL-17  
367 expression from MAIT cells after one day in culture (data not shown). However, after 6 days in  
368 IL-7, MAIT cells expressing IL-17 were greatly increased upon PMA and Ionomycin  
369 stimulation, however, IL-17 remained undetectable in non-MAIT CD8+ T cells (Fig. 7e). This  
370 finding suggests that MAIT cells can also undergo priming with cytokines, similar to the classic  
371 Th17 cells (Wan et al., 2011) and IL-17 expression mimics tissue-resident MAIT cells  
372 (Sobkowiak et al., 2019).

373  
374 In addition, we also determined IFN $\gamma$  and TNF $\alpha$  secretion from CD8+ MAIT and CD8+ non-  
375 MAIT CD45RO+ (memory) T cells after 6 days in culture with IL-7 (Fig. 7f). There was no  
376 significant difference in ME/CFS patients for IFN $\gamma$ + MAIT cells ( $p = 0.5$ ), but we found highly  
377 reduced IL-17+IFN $\gamma$ + MAIT cells in ME/CFS patients compared to healthy controls ( $p = 0.0075$ )  
378 (Fig. 7g). The frequency of IFN $\gamma$ + secreting cells was also reduced within CD8+ non-MAIT cells  
379 ( $p = 0.0057$ ) and within CD8+CD45RO+ memory T cells ( $p = 0.0002$ ), in ME/CFS PBMC cultured  
380 for 6 days in IL-7 (Fig. 7h).

### 381 382 **Changes in regulatory T (Treg) cells in ME/CFS patients**

383  
384 Regulatory T (Tregs) cells are critical in controlling autoreactive or excessive immune responses.  
385 Given the observed perturbation in the effector functions of T cell subsets that suggest chronic  
386 immune activation, we hypothesized that there would be a corresponding increase in Tregs in  
387 ME/CFS patients. For this experiment, we used Foxp3 and Helios as markers to assess Treg cell  
388 frequencies within both naïve and memory CD4+ T cells, as previously described (Mercer et al.,  
389 2014) (Fig. 8a). Indeed, frequencies of both naïve Tregs ( $p = 0.0005$ ), and memory Tregs  
390 ( $p = 0.0094$ ) were increased in ME/CFS compared to controls (Fig. 8b).

391  
392 When broken down into groups where subjects were younger or older than 50 years, naïve Tregs  
393 showed a highly significant difference in ME/CFS patients vs controls in the younger than 50  
394 years group ( $p = 0.0083$ ), and a slightly significant difference in ME/CFS patients vs controls in  
395 the older than 50 years group ( $p = 0.0209$ ). The difference in memory Tregs was also significant  
396 between ME/CFS patients and controls younger than 50 years ( $p = 0.0116$ ), but not when older  
397 than 50 years groups were compared ( $p = 0.6$ ) (Fig. 8c). There was no correlation with subject age

398 for ME/CFS patients or controls for naïve Tregs ( $r_s=-0.02541$  and  $r_s=-0.01592$ , respectively), or  
399 for memory Tregs ( $r_s=0.2691$  and  $r_s=0.1585$ , respectively) (Fig. 8d).

400  
401 The ratio of Th17 cells to Tregs is an important feature that is perturbed during chronic  
402 inflammatory conditions or autoimmune diseases. Therefore, we also determined this ratio in  
403 ME/CFS patients vs healthy controls. While the Th17 (CCR6+ IL-17-secreting cells) frequency  
404 did not correlate with memory Treg cells in ME/CFS patients ( $r_s=0.2750$ ) or healthy controls  
405 ( $r_s=-0.08416$ ), remarkably, the ratio of these two related subsets were also highly different  
406 between the ME/CFS patients and the healthy controls ( $p<0.0001$ ) (Fig. 8e)

### 407 408 **Machine learning analysis to identify predictive immune parameters for ME/CFS**

409  
410 Our immune profiling analysis identified many T cell subset parameters that were different in  
411 ME/CFS patients vs healthy controls. From the total of 65 immune profile features, 40 features  
412 were identified as different at a 5% false discovery rate (Supplemental Table 2). However, while  
413 some of these were highly significant, given the high variability and ranges in humans for  
414 immune parameters, on their own they would not have clinically relevant specificity and  
415 sensitivity to discriminate patients from healthy individuals. Therefore, we decided to use a  
416 classifier model using a machine learning algorithm called the random forest (RF) classifier  
417 (Wang and Li, 2017).

418  
419 The RF classifier or algorithm is an ensemble method that depends on a large number of  
420 individual classification trees (Wang and Li, 2017;Huynh-Thu and Geurts, 2019). Each  
421 classification tree emits a predicted class and the class with the most votes becomes the model  
422 prediction. The individual trees are designed using a randomly selected number of samples  
423 (sampling with replacement) and a randomly selected feature set to minimize correlation  
424 between trees. A large number of relatively uncorrelated classification trees (models) are  
425 combined to provide a robust classification of the individual sample (Aevermann et al., 2018).  
426 As such, we implemented an RF model to classify ME/CFS patients and healthy controls using  
427 the immune profiling data. The performance of the RF was evaluated using the receiver  
428 operating characteristic (ROC) curve, which is created by plotting the true positive rate (TPR)  
429 against the false positive rate (FPR). The class prediction probability of a sample can be  
430 computed based on the proportion of votes obtained for that call. Given a threshold T for the  
431 probability, a sample is classified as an ME/CFS patient if the probability is higher than T and  
432 the ROC curve plots TPR against the FPR.

433  
434 The area under the ROC curve which is denoted by AUC is equal to the probability that a  
435 randomly chosen positive instance will be ranked higher than a randomly chosen negative  
436 instance. A perfect classifier will have the maximal area under the curve of 1. The ROC curves  
437 of the RF classifier corresponding to 4 subsets of immune profile features are shown in Figure 9.  
438 The AUC of the RF classifier using all 65 features is ~0.93, meaning that there is a chance of 93%  
439 that the classifier will correctly distinguish between patients and healthy controls (Fig. 9 and  
440 Table 1). The 40 significantly different features or top 10 features with the highest importance  
441 score among these 40 significantly different immune parameters had slightly lower AUC scores  
442 (~0.92 and ~0.88, respectively), whereas the top 10 significantly different features had a lower  
443 AUC score (~0.82) (Fig. 9 and Table 1, full list of the features are in supplemental Tables 2, 3).

444

## 445 **Discussion**

446

447 Several studies of the immune system of ME/CFS subjects have revealed disruptions in the  
448 number and function of T cell subsets, B cells and natural killer (NK) cells in patient blood  
449 (Fletcher et al., 2010; Brenu et al., 2012; Curriu et al., 2013; Brenu et al., 2014). Here we extend  
450 these findings and show a highly significant disruption in several key T cell subset frequencies,  
451 and importantly, their effector functions. Our findings reveal profound changes in the functional  
452 capacity of mucosal associated T cell (MAIT) and Th17 cells, Tregs, and signs of CD8+ T cell  
453 and NK cell disruption in a subset of younger subjects. Given that these cell types are involved in  
454 regulating viral or bacterial infections or the microbiota, our findings suggest that some of the  
455 ME/CFS patients have severe immune perturbations likely triggered by chronic infections or are  
456 associated with changes in the microbiome.

457

458 Our observation that both CD8+ T cells and NK cells are proportionately reduced in ME/CFS  
459 subjects may also reflect chronic viral infection or persistence (such as CMV or EBV infections)  
460 that triggers a chronic activated state of these cells. It is important to note that this difference was  
461 predominantly observed in subjects younger than 50 years old, as healthy subjects over the age  
462 of 50 also begin to display a similar phenotype as patients and thus were no longer statistically  
463 different compared to patient subjects. Indeed, this is consistent with the increase in chronic viral  
464 infections seen during normal aging, such as CMV seropositivity (Ellefsen et al., 2002).  
465 However, given this distribution, these subset differences alone are unlikely to be the main cause  
466 of ME/CFS symptoms as it is apparent there are also multiple and severe changes in the effector  
467 functions of other T cell subsets. In addition, the proportion of CMV/EBV infection among  
468 healthy controls and ME/CFS patients was not significantly different in either age group (data  
469 not shown).

470

471 Another T cell subset that we found to be highly disrupted in ME/CFS subjects was Th17 cells,  
472 which are characterized by secretion of IL-17, expression of chemokine receptor CCR6 and  
473 transcription factor RORC (Sallusto et al., 2012). Th17 cells play a major role in both immune  
474 response to bacterial or fungal infections and in pathogenesis of autoimmune or chronic  
475 inflammatory diseases (Tesmer et al., 2008; Sallusto and Lanzavecchia, 2009). We previously  
476 found that a significant portion of cells programmed towards the Th17 phenotype do not  
477 immediately secrete IL-17 but require a priming stage with IL-7 or IL-15, which we call poised  
478 Th17 cells (Wan et al., 2011). Indeed, when we performed an assay by culturing PBMC in IL-7  
479 for 6 days before analyzing the IL-17 production from these poised CCR6+ Th17 cells, the  
480 differences between ME/CFS patients and controls became profound. However, while there were  
481 less Th17 cells producing IL-17 in ME/CFS patients, paradoxically the proportion of CCR6+  
482 Th17 cells were significantly higher compared to controls. Together these findings suggest  
483 chronic activation of the Th17 subset that potentially induces an “exhausted” state, as when their  
484 numbers are increased due to chronic stimulation, they become more dysfunctional. One possible  
485 culprit for chronic Th17 cell stimulation could be the changes in the composition of microbiota,  
486 or dysbiosis that is caused by shifting balances in beneficial or harmful bacteria species  
487 (Omenetti and Pizarro, 2015), as seen during HIV infection (Lujan et al., 2019), and as  
488 contributes to autoimmune diseases (Gulden et al., 2015). There is also evidence that Th17 cells  
489 can respond to specific microbiota-associated bacteria such as *Prevotella* species (Larsen, 2017).

490 Indeed, several reports have identified microbiome changes in ME/CFS (Shukla et al.,  
491 2015;Giloteaux et al., 2016;Navaneetharaja et al., 2016;Nagy-Szakal et al., 2017;Proal and  
492 Marshall, 2018).

493  
494 Regulatory T cells (Tregs) are tasked with suppressing autoimmune and excessive chronic  
495 inflammatory responses (Sakaguchi et al., 2010;Yamaguchi et al., 2011). Our finding that Tregs  
496 are increased in ME/CFS patients is consistent with our other findings that there appears to be a  
497 chronic activation of major T cell subsets with yet to be identified stimuli. Increased Tregs in  
498 patients may reflect the disturbance of the Th17 and Th1/Th2 cytokine balance in ME/CFS  
499 patients, suggesting a major disruption in homeostatic maintenance of immune responses.  
500 Indeed, for example, the balance between Th17 cells and Tregs is also critical in the regulation of  
501 inflammation, especially related to the gut and microbiome (Omenetti and Pizarro,  
502 2015;Pandiyani et al., 2019). Remarkably, we found a correlation between Th17 and Treg cells in  
503 ME/CFS patients, and found the ratio was even more significantly different in patients compared  
504 to controls. These findings reveal potential biomarkers that can be utilized in future clinical  
505 interventions to re-balance the microbiome and the mucosal immune responses. In future studies  
506 it will also be important to further investigate in more detail the different subsets of Tregs for  
507 their suppressive capacity, and as with other subsets, to identify the mechanisms that lead to their  
508 increase in ME/CFS patients.

509  
510 In our analysis, another T cell subset that was profoundly different between patients and controls,  
511 both phenotypically and functionally, was MAIT cells. MAIT cells selectively respond to a  
512 broad range of bacteria that possess the biosynthetic pathway for riboflavin metabolism (Gold et  
513 al., 2010;Le Bourhis et al., 2010;Kjer-Nielsen et al., 2012;Meierovics et al., 2013). A recent  
514 study found significant changes in the frequency of CD8+ MAIT cells in Multiple Sclerosis and  
515 severe ME/CFS patients (Cliff et al., 2019). We did not observe significant changes in the  
516 frequency of MAIT cells as a percentage of PBMC or T cells, which could be due to fact that this  
517 T cell subset is highly variable and has up to a 40-fold difference in range, even among healthy  
518 humans (Ben Youssef et al., 2018), and that most of our patient group was not characterized as  
519 severe. However, we observed profound differences in MAIT cell functions and differentiated  
520 states in ME/CFS subjects, such as reduced production of cytokines (IFN $\gamma$ , IL-17) or cytotoxic  
521 molecule GranzymeA, and an increased proportion of CD27 negative CD8+ MAIT cells, which  
522 correlated with their lower survival in 6 day culture with IL-7 in vitro. Given that MAIT cells are  
523 specifically activated by a bacteria-produced riboflavin (vitamin B2) metabolite, we reason that  
524 this perturbation in MAIT cells can also be associated with differences in the composition of the  
525 microbiota of the patients. Indeed, we recently showed that MAIT cells can respond to a variety  
526 of microbiome-related bacteria (Tastan et al., 2018) and that they potentially function to tune or  
527 sense the microbial ecosystem throughout mucosal tissues. Two recent papers also show that  
528 MAIT cell development and expansion is also directly dependent on the microbiome  
529 (Constantinides et al., 2019;Legoux et al., 2019;Oh and Unutmaz, 2019). In one paper, the  
530 authors show that CD4-CD8- (double negative, or DN) MAIT cells are a functionally distinct  
531 subset that migrate to the skin in mice and are potentially involved in tissue repair (Dias et al.,  
532 2018;Constantinides et al., 2019;Oh and Unutmaz, 2019). Thus, it is interesting to note that we  
533 observed differences in CD8+ but not in DN MAIT cells in ME/CFS subjects, suggesting that  
534 these are different lineages or subsets. Taken together, it is conceivable that a disruption in the

535 microbiome results in chronic activation of MAIT cells and an exhausted state in ME/CFS  
536 patients, which is similar to what has been seen with the Th17 subset (Cliff et al., 2019).

537  
538 Finally, using immune parameters as features, our machine learning classifier was able to  
539 identify the ME/CFS patients at a high sensitivity and accuracy when using all 65 features, all 40  
540 significantly different features and the 10 features among the 40 significantly different features  
541 that had the highest importance score. For all cases, we observed a higher value of sensitivity  
542 than specificity, indicating that the proportion of patients identified as ME/CFS patients is higher  
543 than healthy controls who are correctly identified as healthy. One reason for this could be related  
544 to features such as age, which causes the older individuals' immune profiles to become more  
545 similar to those of ME/CFS patients, and hence the RF classifier categorizes healthy controls as  
546 patients. Currently, the diagnosis of ME/CFS is based on clinical symptoms alone and runs the  
547 potential for false positives and negatives. A classifier based on immune profiles might be an  
548 objective solution to better diagnose this clinical problem, but additional testing on larger and  
549 more diverse clinical cohorts will be required to assess the potential clinical utility of such an  
550 approach.

551  
552 In conclusion, our findings open an exciting path to develop a set of biomarkers that can be  
553 utilized to aid in both diagnosis and in stratifying the patient population for targeted or precision  
554 medicine therapeutics.

555  
556

## 557 **Data Availability**

558  
559 The source flow cytometry data for each subject underlying Figs. 1-8 and supplemental figures  
560 and tables will be provided upon reasonable request.

561

## 562 **Ethics Statement**

563  
564 This study was carried out in accordance with the recommendations of the Jackson Laboratory  
565 human subject ethics committee, and IRB protocol approval by Western Institutional Review  
566 board. All subjects gave written informed consent in accordance with the Declaration of  
567 Helsinki.

568

## 569 **Author Contribution**

570  
571 E.K. and C.L.G. contributed equally. E.K. processed blood samples, performed the majority of  
572 the experiments and analysis, and helped with the preparation of the manuscript; C.L.G.  
573 performed the statistical analyses and helped with the preparation of the manuscript; V.R. and  
574 J.G. performed machine learning analysis; P.N.G provided advice and feedback for machine  
575 learning analysis and interpretation; S.R., M.H. and L.P helped with processing blood samples,  
576 performed experiments and analysis; L.K., designed and quality checked all the immune panels;  
577 L.B. and S.D.V. recruited all subjects and clinically diagnosed ME/CFS patients; D.U. conceived  
578 and supervised the study and wrote the manuscript. All authors reviewed and approved the final  
579 draft of the manuscript.

580



581 **Conflict of Interest Statement**

582

583 The authors declare that the research was conducted in the absence of any commercial or  
584 financial relationships that could be construed as a potential conflict of interest.

585

586 **Acknowledgements**

587

588 The research in this study was supported by National Institute of Health (NIH) grants  
589 R01AI121920 to D.U and U54 NS105539 to D.U, S.D.V., L.B and P.R.

590

591 **Abbreviations**

592

593 ME/CFS: myalgic encephalomyelitis/chronic fatigue syndrome

594 PBMC: peripheral blood mononuclear cells

595 DN: double negative; CD4- CD8-

596 NK: natural killer

597 MAIT: mucosal-associated invariant T

598 Treg: T regulatory cells

599 N: naive

600 CM: central memory

601 EM: effector memory

602 EMRA: effector memory RA

603 PMA: phorbol 12-myristate 13-acetate

604 p: probability value

605  $r_s$ : Spearman's Rank Correlation Coefficient

606 K: number of folds in cross validation

607 k: number of features

608 RF: random forest

609 TPR: true positive rate

610 FPR: false positive rate

611 ROC: receiver operating characteristic

612 AUC: area under the curve

613 F1: F score; measure of a test's accuracy

614 EBV: Epstein-Barr virus

615 CMV: cytomegalovirus

616 HIV: human immunodeficiency virus

617

## 618 **References**

- 619
- 620 Adriaensen, W., Derhovanessian, E., Vaes, B., Van Pottelbergh, G., Degryse, J.M., Pawelec, G.,  
621 Hamprecht, K., Theeten, H., and Mathei, C. (2015). CD4:8 ratio >5 is associated with a dominant naive  
622 T-cell phenotype and impaired physical functioning in CMV-seropositive very elderly people: results  
623 from the BELFRAIL study. *J Gerontol A Biol Sci Med Sci* 70, 143-154. 10.1093/gerona/glu018
- 624 Aebermann, B.D., Novotny, M., Bakken, T., Miller, J.A., Diehl, A.D., Osumi-Sutherland, D., Lasken,  
625 R.S., Lein, E.S., and Scheuermann, R.H. (2018). Cell type discovery using single-cell transcriptomics:  
626 implications for ontological representation. *Hum Mol Genet* 27, R40-R47. 10.1093/hmg/ddy100
- 627 Aspler, A.L., Bolshin, C., Vernon, S.D., and Broderick, G. (2008). Evidence of inflammatory immune  
628 signaling in chronic fatigue syndrome: A pilot study of gene expression in peripheral blood. *Behav Brain*  
629 *Funct* 4, 44. 10.1186/1744-9081-4-44
- 630 Bansal, A.S., Bradley, A.S., Bishop, K.N., Kiani-Alikhan, S., and Ford, B. (2012). Chronic fatigue  
631 syndrome, the immune system and viral infection. *Brain Behav Immun* 26, 24-31.  
632 10.1016/j.bbi.2011.06.016
- 633 Ben Youssef, G., Tourret, M., Salou, M., Ghazarian, L., Houdouin, V., Mondot, S., Mburu, Y., Lambert,  
634 M., Azarnoush, S., Diana, J.S., Virilouvet, A.L., Peuchmaur, M., Schmitz, T., Dalle, J.H., Lantz, O.,  
635 Biran, V., and Caillat-Zucman, S. (2018). Ontogeny of human mucosal-associated invariant T cells and  
636 related T cell subsets. *J Exp Med* 215, 459-479. 10.1084/jem.20171739
- 637 Basted, A.C., and Marshall, L.M. (2015). Review of Myalgic Encephalomyelitis/Chronic Fatigue  
638 Syndrome: an evidence-based approach to diagnosis and management by clinicians. *Rev Environ Health*  
639 30, 223-249. 10.1515/reveh-2015-0026
- 640 Brenu, E.W., Huth, T.K., Hardcastle, S.L., Fuller, K., Kaur, M., Johnston, S., Ramos, S.B., Staines, D.R.,  
641 and Marshall-Gradisnik, S.M. (2014). Role of adaptive and innate immune cells in chronic fatigue  
642 syndrome/myalgic encephalomyelitis. *Int Immunol* 26, 233-242. 10.1093/intimm/dxt068
- 643 Brenu, E.W., Van Driel, M.L., Staines, D.R., Ashton, K.J., Hardcastle, S.L., Keane, J., Tajouri, L.,  
644 Peterson, D., Ramos, S.B., and Marshall-Gradisnik, S.M. (2012). Longitudinal investigation of natural  
645 killer cells and cytokines in chronic fatigue syndrome/myalgic encephalomyelitis. *J Transl Med* 10, 88.  
646 10.1186/1479-5876-10-88
- 647 Broderick, G., Fuite, J., Kreitz, A., Vernon, S.D., Klimas, N., and Fletcher, M.A. (2010). A formal  
648 analysis of cytokine networks in chronic fatigue syndrome. *Brain Behav Immun* 24, 1209-1217.  
649 10.1016/j.bbi.2010.04.012
- 650 Carruthers, B.M. (2007). Definitions and aetiology of myalgic encephalomyelitis: how the Canadian  
651 consensus clinical definition of myalgic encephalomyelitis works. *J Clin Pathol* 60, 117-119.  
652 10.1136/jcp.2006.042754
- 653 Cliff, J.M., King, E.C., Lee, J.S., Sepulveda, N., Wolf, A.S., Kingdon, C., Bowman, E., Dockrell, H.M.,  
654 Nacul, L., Lacerda, E., and Riley, E.M. (2019). Cellular Immune Function in Myalgic  
655 Encephalomyelitis/Chronic Fatigue Syndrome (ME/CFS). *Front Immunol* 10, 796.  
656 10.3389/fimmu.2019.00796

- 657 Constantinides, M.G., Link, V.M., Tamoutounour, S., Wong, A.C., Perez-Chaparro, P.J., Han, S.J., Chen,  
658 Y.E., Li, K., Farhat, S., Weckel, A., Krishnamurthy, S.R., Vujkovic-Cvijin, I., Linehan, J.L., Bouladoux,  
659 N., Merrill, E.D., Roy, S., Cua, D.J., Adams, E.J., Bhandoola, A., Scharschmidt, T.C., Aube, J.,  
660 Fischbach, M.A., and Belkaid, Y. (2019). MAIT cells are imprinted by the microbiota in early life and  
661 promote tissue repair. *Science* 366. 10.1126/science.aax6624
- 662 Curriu, M., Carrillo, J., Massanella, M., Rigau, J., Alegre, J., Puig, J., Garcia-Quintana, A.M., Castro-  
663 Marrero, J., Negredo, E., Clotet, B., Cabrera, C., and Blanco, J. (2013). Screening NK-, B- and T-cell  
664 phenotype and function in patients suffering from Chronic Fatigue Syndrome. *J Transl Med* 11, 68.  
665 10.1186/1479-5876-11-68
- 666 Dias, J., Boulouis, C., Gorin, J.B., Van Den Biggelaar, R., Lal, K.G., Gibbs, A., Loh, L., Gulam, M.Y.,  
667 Sia, W.R., Bari, S., Hwang, W.Y.K., Nixon, D.F., Nguyen, S., Betts, M.R., Buggert, M., Eller, M.A.,  
668 Broliden, K., Tjernlund, A., Sandberg, J.K., and Leeansyah, E. (2018). The CD4(-)CD8(-) MAIT cell  
669 subpopulation is a functionally distinct subset developmentally related to the main CD8(+) MAIT cell  
670 pool. *Proc Natl Acad Sci U S A* 115, E11513-E11522. 10.1073/pnas.1812273115
- 671 Dolfi, D.V., and Katsikis, P.D. (2007). CD28 and CD27 costimulation of CD8+ T cells: a story of  
672 survival. *Adv Exp Med Biol* 590, 149-170. 10.1007/978-0-387-34814-8\_11
- 673 Ellefsen, K., Harari, A., Champagne, P., Bart, P.A., Sekaly, R.P., and Pantaleo, G. (2002). Distribution  
674 and functional analysis of memory antiviral CD8 T cell responses in HIV-1 and cytomegalovirus  
675 infections. *Eur J Immunol* 32, 3756-3764. 10.1002/1521-4141(200212)32:12<3756::AID-  
676 IMMU3756>3.0.CO;2-E
- 677 Fletcher, M.A., Zeng, X.R., Maher, K., Levis, S., Hurwitz, B., Antoni, M., Broderick, G., and Klimas,  
678 N.G. (2010). Biomarkers in chronic fatigue syndrome: evaluation of natural killer cell function and  
679 dipeptidyl peptidase IV/CD26. *PLoS One* 5, e10817. 10.1371/journal.pone.0010817
- 680 Fukuda, K., Straus, S.E., Hickie, I., Sharpe, M.C., Dobbins, J.G., and Komaroff, A. (1994). The chronic  
681 fatigue syndrome: a comprehensive approach to its definition and study. International Chronic Fatigue  
682 Syndrome Study Group. *Ann Intern Med* 121, 953-959. 10.7326/0003-4819-121-12-199412150-00009
- 683 Giloteaux, L., Goodrich, J.K., Walters, W.A., Levine, S.M., Ley, R.E., and Hanson, M.R. (2016).  
684 Reduced diversity and altered composition of the gut microbiome in individuals with myalgic  
685 encephalomyelitis/chronic fatigue syndrome. *Microbiome* 4, 30. 10.1186/s40168-016-0171-4
- 686 Godfrey, D.I., Koay, H.F., McCluskey, J., and Gherardin, N.A. (2019). The biology and functional  
687 importance of MAIT cells. *Nat Immunol* 20, 1110-1128. 10.1038/s41590-019-0444-8
- 688 Gold, M.C., Cerri, S., Smyk-Pearson, S., Cansler, M.E., Vogt, T.M., Delepine, J., Winata, E., Swarbrick,  
689 G.M., Chua, W.J., Yu, Y.Y., Lantz, O., Cook, M.S., Null, M.D., Jacoby, D.B., Harriff, M.J., Lewinsohn,  
690 D.A., Hansen, T.H., and Lewinsohn, D.M. (2010). Human mucosal associated invariant T cells detect  
691 bacterially infected cells. *PLoS Biol* 8, e1000407. 10.1371/journal.pbio.1000407
- 692 Grant, E.J., Nussing, S., Sant, S., Clemens, E.B., and Kedzierska, K. (2017). The role of CD27 in anti-  
693 viral T-cell immunity. *Curr Opin Virol* 22, 77-88. 10.1016/j.coviro.2016.12.001
- 694 Gulden, E., Wong, F.S., and Wen, L. (2015). The gut microbiota and Type 1 Diabetes. *Clin Immunol* 159,  
695 143-153. 10.1016/j.clim.2015.05.013

- 696 Hickie, I., Davenport, T., Wakefield, D., Vollmer-Conna, U., Cameron, B., Vernon, S.D., Reeves, W.C.,  
697 Lloyd, A., and Dubbo Infection Outcomes Study, G. (2006). Post-infective and chronic fatigue syndromes  
698 precipitated by viral and non-viral pathogens: prospective cohort study. *BMJ* 333, 575.  
699 10.1136/bmj.38933.585764.AE
- 700 Holgate, S.T., Komaroff, A.L., Mangan, D., and Wessely, S. (2011). Chronic fatigue syndrome:  
701 understanding a complex illness. *Nat Rev Neurosci* 12, 539-544. 10.1038/nrn3087
- 702 Huynh-Thu, V.A., and Geurts, P. (2019). Unsupervised Gene Network Inference with Decision Trees and  
703 Random Forests. *Methods Mol Biol* 1883, 195-215. 10.1007/978-1-4939-8882-2\_8
- 704 Katz, B.Z., Shiraishi, Y., Mears, C.J., Binns, H.J., and Taylor, R. (2009). Chronic fatigue syndrome after  
705 infectious mononucleosis in adolescents. *Pediatrics* 124, 189-193. 10.1542/peds.2008-1879
- 706 Khaitan, A., Kilberg, M., Kravietz, A., Ilmet, T., Tastan, C., Mwamzuka, M., Marshed, F., Liu, M.,  
707 Ahmed, A., Borkowsky, W., and Unutmaz, D. (2016). HIV-Infected Children Have Lower Frequencies of  
708 CD8+ Mucosal-Associated Invariant T (MAIT) Cells that Correlate with Innate, Th17 and Th22 Cell  
709 Subsets. *PLoS One* 11, e0161786. 10.1371/journal.pone.0161786
- 710 Kjer-Nielsen, L., Patel, O., Corbett, A.J., Le Nours, J., Meehan, B., Liu, L., Bhati, M., Chen, Z.,  
711 Kostenko, L., Reantragoon, R., Williamson, N.A., Purcell, A.W., Dudek, N.L., Mcconville, M.J., O'hair,  
712 R.A., Khairallah, G.N., Godfrey, D.I., Fairlie, D.P., Rossjohn, J., and McCluskey, J. (2012). MR1 presents  
713 microbial vitamin B metabolites to MAIT cells. *Nature* 491, 717-723. 10.1038/nature11605
- 714 Klimas, N.G., Broderick, G., and Fletcher, M.A. (2012). Biomarkers for chronic fatigue. *Brain Behav*  
715 *Immun* 26, 1202-1210. 10.1016/j.bbi.2012.06.006
- 716 Larsen, J.M. (2017). The immune response to Prevotella bacteria in chronic inflammatory disease.  
717 *Immunology* 151, 363-374. 10.1111/imm.12760
- 718 Le Bourhis, L., Martin, E., Peguillet, I., Guihot, A., Froux, N., Core, M., Levy, E., Dusseaux, M.,  
719 Meyssonier, V., Premel, V., Ngo, C., Riteau, B., Duban, L., Robert, D., Huang, S., Rottman, M.,  
720 Soudais, C., and Lantz, O. (2010). Antimicrobial activity of mucosal-associated invariant T cells. *Nat*  
721 *Immunol* 11, 701-708. 10.1038/ni.1890
- 722 Legoux, F., Bellet, D., Daviaud, C., El Morr, Y., Darbois, A., Niort, K., Procopio, E., Salou, M., Gilet, J.,  
723 Ryffel, B., Balvay, A., Foussier, A., Sarkis, M., El Marjou, A., Schmidt, F., Rabot, S., and Lantz, O.  
724 (2019). Microbial metabolites control the thymic development of mucosal-associated invariant T cells.  
725 *Science* 366, 494-499. 10.1126/science.aaw2719
- 726 Lorusso, L., Mikhaylova, S.V., Capelli, E., Ferrari, D., Ngonga, G.K., and Ricevuti, G. (2009).  
727 Immunological aspects of chronic fatigue syndrome. *Autoimmun Rev* 8, 287-291.  
728 10.1016/j.autrev.2008.08.003
- 729 Lujan, J.A., Rugeles, M.T., and Taborda, N.A. (2019). Contribution of the Microbiota to Intestinal  
730 Homeostasis and its Role in the Pathogenesis of HIV-1 Infection. *Curr HIV Res* 17, 13-25.  
731 10.2174/1570162X17666190311114808
- 732 Meierovics, A., Yankelevich, W.J., and Cowley, S.C. (2013). MAIT cells are critical for optimal mucosal  
733 immune responses during in vivo pulmonary bacterial infection. *Proc Natl Acad Sci U S A* 110, E3119-  
734 3128. 10.1073/pnas.1302799110

- 735 Mensah, F.K.F., Bansal, A.S., Ford, B., and Cambridge, G. (2017). Chronic fatigue syndrome and the  
736 immune system: Where are we now? *Neurophysiol Clin* 47, 131-138. 10.1016/j.neucli.2017.02.002
- 737 Mercer, F., Khaitan, A., Kozhaya, L., Aberg, J.A., and Unutmaz, D. (2014). Differentiation of IL-17-  
738 producing effector and regulatory human T cells from lineage-committed naive precursors. *J Immunol*  
739 193, 1047-1054. 10.4049/jimmunol.1302936
- 740 Milner, J.D., Sandler, N.G., and Douek, D.C. (2010). Th17 cells, Job's syndrome and HIV: opportunities  
741 for bacterial and fungal infections. *Curr Opin HIV AIDS* 5, 179-183. 10.1097/COH.0b013e328335ed3e
- 742 Nagy-Szakal, D., Williams, B.L., Mishra, N., Che, X., Lee, B., Bateman, L., Klimas, N.G., Komaroff,  
743 A.L., Levine, S., Montoya, J.G., Peterson, D.L., Ramanan, D., Jain, K., Eddy, M.L., Hornig, M., and  
744 Lipkin, W.I. (2017). Fecal metagenomic profiles in subgroups of patients with myalgic  
745 encephalomyelitis/chronic fatigue syndrome. *Microbiome* 5, 44. 10.1186/s40168-017-0261-y
- 746 Navaneetharaja, N., Griffiths, V., Wileman, T., and Carding, S.R. (2016). A Role for the Intestinal  
747 Microbiota and Virome in Myalgic Encephalomyelitis/Chronic Fatigue Syndrome (ME/CFS)? *J Clin Med*  
748 5. 10.3390/jcm5060055
- 749 Oh, J., and Unutmaz, D. (2019). Immune cells for microbiota surveillance. *Science* 366, 419-420.  
750 10.1126/science.aaz4014
- 751 Omenetti, S., and Pizarro, T.T. (2015). The Treg/Th17 Axis: A Dynamic Balance Regulated by the Gut  
752 Microbiome. *Front Immunol* 6, 639. 10.3389/fimmu.2015.00639
- 753 Ortega-Hernandez, O.D., and Shoenfeld, Y. (2009). Infection, vaccination, and autoantibodies in chronic  
754 fatigue syndrome, cause or coincidence? *Ann N Y Acad Sci* 1173, 600-609. 10.1111/j.1749-  
755 6632.2009.04799.x
- 756 Pandiyan, P., Bhaskaran, N., Zou, M., Schneider, E., Jayaraman, S., and Huehn, J. (2019). Microbiome  
757 Dependent Regulation of Tregs and Th17 Cells in Mucosa. *Front Immunol* 10, 426.  
758 10.3389/fimmu.2019.00426
- 759 Prinsen, H., De Vries, I.J., Torensma, R., Pots, J.M., Mulder, S.F., Van Herpen, C.M., Elving, L.D.,  
760 Bleijenberg, G., Stelma, F.F., and Van Laarhoven, H.W. (2012). Humoral and cellular immune responses  
761 after influenza vaccination in patients with chronic fatigue syndrome. *BMC Immunol* 13, 71.  
762 10.1186/1471-2172-13-71
- 763 Proal, A., and Marshall, T. (2018). Myalgic Encephalomyelitis/Chronic Fatigue Syndrome in the Era of  
764 the Human Microbiome: Persistent Pathogens Drive Chronic Symptoms by Interfering With Host  
765 Metabolism, Gene Expression, and Immunity. *Front Pediatr* 6, 373. 10.3389/fped.2018.00373
- 766 Rivas, J.L., Palencia, T., Fernandez, G., and Garcia, M. (2018). Association of T and NK Cell Phenotype  
767 With the Diagnosis of Myalgic Encephalomyelitis/Chronic Fatigue Syndrome (ME/CFS). *Front Immunol*  
768 9, 1028. 10.3389/fimmu.2018.01028
- 769 Romagnani, S., Maggi, E., Liotta, F., Cosmi, L., and Annunziato, F. (2009). Properties and origin of  
770 human Th17 cells. *Mol Immunol* 47, 3-7. 10.1016/j.molimm.2008.12.019
- 771 Sakaguchi, S., Miyara, M., Costantino, C.M., and Hafler, D.A. (2010). FOXP3+ regulatory T cells in the  
772 human immune system. *Nat Rev Immunol* 10, 490-500. 10.1038/nri2785



- 773 Sallusto, F., Geginat, J., and Lanzavecchia, A. (2004). Central memory and effector memory T cell  
774 subsets: function, generation, and maintenance. *Annu Rev Immunol* 22, 745-763.  
775 10.1146/annurev.immunol.22.012703.104702
- 776 Sallusto, F., and Lanzavecchia, A. (2009). Human Th17 cells in infection and autoimmunity. *Microbes*  
777 *Infect* 11, 620-624. 10.1016/j.micinf.2009.04.004
- 778 Sallusto, F., Zielinski, C.E., and Lanzavecchia, A. (2012). Human Th17 subsets. *Eur J Immunol* 42, 2215-  
779 2220. 10.1002/eji.201242741
- 780 Salou, M., Franciszkiewicz, K., and Lantz, O. (2017). MAIT cells in infectious diseases. *Curr Opin*  
781 *Immunol* 48, 7-14. 10.1016/j.coi.2017.07.009
- 782 Serrano-Villar, S., Moreno, S., Fuentes-Ferrer, M., Sanchez-Marcos, C., Avila, M., Sainz, T., De Villar,  
783 N.G., Fernandez-Cruz, A., and Estrada, V. (2014). The CD4:CD8 ratio is associated with markers of age-  
784 associated disease in virally suppressed HIV-infected patients with immunological recovery. *HIV Med* 15,  
785 40-49. 10.1111/hiv.12081
- 786 Shukla, S.K., Cook, D., Meyer, J., Vernon, S.D., Le, T., Clevidence, D., Robertson, C.E., Schrodi, S.J.,  
787 Yale, S., and Frank, D.N. (2015). Changes in Gut and Plasma Microbiome following Exercise Challenge  
788 in Myalgic Encephalomyelitis/Chronic Fatigue Syndrome (ME/CFS). *PLoS One* 10, e0145453.  
789 10.1371/journal.pone.0145453
- 790 Sobkowiak, M.J., Davanian, H., Heymann, R., Gibbs, A., Emgard, J., Dias, J., Aleman, S., Kruger-  
791 Weiner, C., Moll, M., Tjernlund, A., Leeansyah, E., Sallberg Chen, M., and Sandberg, J.K. (2019).  
792 Tissue-resident MAIT cell populations in human oral mucosa exhibit an activated profile and produce IL-  
793 17. *Eur J Immunol* 49, 133-143. 10.1002/eji.201847759
- 794 Tastan, C., Karhan, E., Zhou, W., Fleming, E., Voigt, A.Y., Yao, X., Wang, L., Horne, M., Placek, L.,  
795 Kozhaya, L., Oh, J., and Unutmaz, D. (2018). Tuning of human MAIT cell activation by commensal  
796 bacteria species and MR1-dependent T-cell presentation. *Mucosal Immunol* 11, 1591-1605.  
797 10.1038/s41385-018-0072-x
- 798 Tesmer, L.A., Lundy, S.K., Sarkar, S., and Fox, D.A. (2008). Th17 cells in human disease. *Immunol Rev*  
799 223, 87-113. 10.1111/j.1600-065X.2008.00628.x
- 800 Torres-Harding, S., Sorenson, M., Jason, L.A., Maher, K., and Fletcher, M.A. (2008). Evidence for T-  
801 helper 2 shift and association with illness parameters in chronic fatigue syndrome (CFS). *Bull IACFS ME*  
802 16, 19-33.
- 803 Ussher, J.E., Bilton, M., Attwod, E., Shadwell, J., Richardson, R., De Lara, C., Mettke, E., Kurioka, A.,  
804 Hansen, T.H., Klenerman, P., and Willberg, C.B. (2014). CD161<sup>++</sup> CD8<sup>+</sup> T cells, including the MAIT  
805 cell subset, are specifically activated by IL-12+IL-18 in a TCR-independent manner. *Eur J Immunol* 44,  
806 195-203. 10.1002/eji.201343509
- 807 Valdez, A.R., Hancock, E.E., Adebayo, S., Kiernicki, D.J., Proskauer, D., Attewell, J.R., Bateman, L.,  
808 Demaria, A., Jr., Lapp, C.W., Rowe, P.C., and Proskauer, C. (2018). Estimating Prevalence,  
809 Demographics, and Costs of ME/CFS Using Large Scale Medical Claims Data and Machine Learning.  
810 *Front Pediatr* 6, 412. 10.3389/fped.2018.00412

- 811 Wan, Q., Kozhaya, L., Elhed, A., Ramesh, R., Carlson, T.J., Djuretic, I.M., Sundrud, M.S., and Unutmaz,  
812 D. (2011). Cytokine signals through PI-3 kinase pathway modulate Th17 cytokine production by CCR6+  
813 human memory T cells. *J Exp Med* 208, 1875-1887. 10.1084/jem.20102516
- 814 Wang, H., and Li, G. (2017). A Selective Review on Random Survival Forests for High Dimensional  
815 Data. *Quant Biosci* 36, 85-96. 10.22283/qbs.2017.36.2.85
- 816 Yamaguchi, T., Wing, J.B., and Sakaguchi, S. (2011). Two modes of immune suppression by Foxp3(+)  
817 regulatory T cells under inflammatory or non-inflammatory conditions. *Semin Immunol* 23, 424-430.  
818 10.1016/j.smim.2011.10.002
- 819 Yan, H., Kuroiwa, A., Tanaka, H., Shindo, M., Kiyonaga, A., and Nagayama, A. (2001). Effect of  
820 moderate exercise on immune senescence in men. *Eur J Appl Physiol* 86, 105-111.  
821 10.1007/s004210100521
- 822 Yan, J., Greer, J.M., Hull, R., O'sullivan, J.D., Henderson, R.D., Read, S.J., and McCombe, P.A. (2010).  
823 The effect of ageing on human lymphocyte subsets: comparison of males and females. *Immun Ageing* 7,  
824 4. 10.1186/1742-4933-7-4
- 825 Yancey, J.R., and Thomas, S.M. (2012). Chronic fatigue syndrome: diagnosis and treatment. *Am Fam*  
826 *Physician* 86, 741-746.  
827  
828

## 829 **Figure Legends**

830

831 **Figure 1. Frequency of CD4+ and CD8+ T cell subsets in ME/CFS patients and healthy**  
832 **controls.** Analysis of frequency of main immune subsets in PBMC by flow cytometry was  
833 performed after staining and gating on (a) CD14+ (Monocytes) and CD19+ (B cells), and (b)  
834 CD3+ (T cells) and CD3-2B4+ (NK cells), and proportion of each subset frequency as a portion  
835 of PBMC are shown for each subject (right panels). (c) Frequencies of CD4+ and CD8+ T cells  
836 and their ratio were analyzed within CD3+ T cell gates. (d) Correlation of T cell subsets with age  
837 in ME/CFS patients and controls. (e) CD8+ T cell and CD4 to CD8 T cell ratio distribution in  
838 ages older and younger than 50 years in ME/CFS and controls, (f) Correlation of NK cells with  
839 age in ME/CFS patients and controls, (g) NK cell ratio distribution in groups based on ages older  
840 and younger than 50 years. Data from healthy controls (Healthy, n = 90) and ME/CFS patients  
841 (ME/CFS, n = 186) for a (left), from Healthy (n = 91) and ME/CFS (n = 190) for a (right), b  
842 (left), c, d, and e, from Healthy (n = 91) and ME/CFS (n = 189) for b (right), f, and g, and were  
843 compared by Mann-Whitney U test for non-parametric data, with exact p values, average (AVG)  
844 and median (MED) values are shown. Correlations of data were performed using nonparametric  
845 Spearman correlation, with exact  $r_s$  and p value shown.

846

847 **Supplemental Figure 1.** (a) The frequency of each subset was correlated to subject age for  
848 CD4+ T cells, with clinical groups compared by nonparametric Spearman correlation, with exact  
849  $r_s$  and p-value shown. (b) Analysis of CD4+ T cell subset frequencies in healthy control and  
850 ME/CFS patients that have been divided into two groups based on ages older and younger than  
851 50 years. Data from healthy controls (Healthy, n = 91) and ME/CFS patients (ME/CFS, n = 190)  
852 for a and b, and clinical groups were compared by Mann-Whitney test for non-parametric data,  
853 with exact p values shown.

854

855 **Figure 2. Frequencies of Naïve and memory T cell subset in ME/CFS patients.** (a) T cell  
856 subsets were analyzed in PBMC with CD45RO and CCR7 expression after gating on  
857 CD3+CD4+ (left) and CD3+CD8+ T cell subsets (right), which were then subdivided into  
858 CD45RO-CCR7+ or naïve (N), CD45RO+CCR7+ or central memory (CM), CD45RO+CCR7-  
859 or effector memory (EM), and CD45RO-CCR7- effector memory RA (EMRA) subsets as  
860 shown. (b) Proportions of naïve (N), central memory (CM), effector memory (EM) and effector  
861 memory RA (EMRA) T cell subsets were analyzed within CD3+CD4+ T cells and (c)  
862 CD3+CD8+ T cells in ME/CFS and healthy subjects. (d) The frequency of each subset was  
863 correlated to subject age for CD8+ T cells, by nonparametric Spearman correlation, with exact  $r_s$   
864 and p-value shown. (e) Analysis of CD8+ T cell subset frequencies in controls and ME/CFS  
865 patients that have been divided into two groups based on ages older and younger than 50 years.  
866 Data from healthy controls (Healthy, n = 91) and ME/CFS patients (ME/CFS, n = 190) for b-e,  
867 and groups were compared by Mann-Whitney test for non-parametric data, with exact p values  
868 shown, average (AVG) and median (MED) values are also shown. Correlations of data were  
869 performed using nonparametric Spearman correlation, with exact  $r_s$  and p value shown.

870

871 **Figure 3. Analysis of Th17 cell frequency and function in ME/CFS subjects.** PBMC purified  
872 from patient or control blood were cultured for one day (d1) in IL-7 and then stimulated and  
873 stained with specific antibodies shown for flow analysis, as described in methods. (a)  
874 CD3+CD4+ cells were gated and the proportion of CD45RO+ and CCR6+ or CCR6- cells

875 analyzed. (b) CD4<sup>+</sup> memory (CD45RO<sup>+</sup>) T cells expressing IFN $\gamma$  and/or IL-17 or after gating  
876 into CCR6<sup>+</sup> and CCR6<sup>-</sup> T cells. (c) The frequency of IL-17 and/or IFN $\gamma$  expression in  
877 CD4<sup>+</sup>CD45RO<sup>+</sup> memory T cells in ME/CFS patient or control PBMC. (d) Same analysis was  
878 performed in PBMC after 6-day (d6) culture in IL-7. (e) Correlation of CD4<sup>+</sup>CD45RO<sup>+</sup> memory  
879 T cells secreting IL-17 and/or IFN $\gamma$  with subject age. Groups compared by nonparametric  
880 Spearman correlation, with exact  $r_s$  and p-value shown. (f) Analysis of CD45RO<sup>+</sup> memory IL-  
881 17 and/or IFN $\gamma$  producing cells in control and ME/CFS patients divided into two groups based on  
882 ages older and younger than 50 years. Data from healthy controls (Healthy, n = 80) and ME/CFS  
883 patients (ME/CFS, n = 198) for c, from Healthy (n = 90) and ME/CFS (n = 195) for d, e, and f,  
884 and groups were compared by Mann-Whitney test for non-parametric data, with exact p-values,  
885 average (AVG) and median (MED) values shown. Correlations of data were performed using  
886 nonparametric Spearman correlation, with exact  $r_s$  and p value shown.  
887

888 **Figure 4. Disruption of Th17 cells in ME/CFS patients.** (a) Proportion of CCR6<sup>+</sup> T cells in  
889 memory CD4<sup>+</sup> cells after day 1 (d1) or day 6 (d6) in culture in IL-7. (b) The frequency of  
890 CCR6<sup>+</sup> T cells in memory CD4<sup>+</sup> cells after day-1 culture correlated to subject age. Groups  
891 compared by nonparametric Spearman correlation, with exact  $r_s$  and p-value shown. Analysis of  
892 CCR6<sup>+</sup> T cells in memory CD4<sup>+</sup> cells after day-1 culture in healthy control and ME/CFS  
893 patients divided into two age groups, (c) IL-17 and IFN $\gamma$  expression in CD4<sup>+</sup>CCR6<sup>+</sup>CD45RO<sup>+</sup>  
894 T cells in PBMC culture in IL-7 for 1 day or (d) for 6 days, post activation as described in  
895 methods. (e) Ratio of CD4<sup>+</sup>CCR6<sup>+</sup> cells to IL-17<sup>+</sup> or total IFN $\gamma$ <sup>+</sup> CD4<sup>+</sup> memory cells  
896 calculated after cells after day-1 culture or (f) after 6 days in culture with IL-7. Data from healthy  
897 controls (Healthy, n = 81) and ME/CFS patients (ME/CFS, n = 198) for a (left), from Healthy (n  
898 = 90) and ME/CFS (n = 195) for a (right), from Healthy (n = 80) and ME/CFS (n = 197) for b,  
899 from Healthy (n = 80) and ME/CFS (n = 198) for c and e, from Healthy (n = 90) and ME/CFS (n  
900 = 196) for d, from Healthy (n = 90) and ME/CFS (n = 195) for f, and groups were compared by  
901 Mann-Whitney test for non-parametric data, with exact p values shown. Average (AVG) and  
902 median (MED) are also shown. Correlations of data were performed using nonparametric  
903 Spearman correlation, with exact  $r_s$  and p value shown.  
904

905 **Figure 5. Disruption of Th17 cells.** PBMC from ME/CFS patients and healthy controls were  
906 cultured in IL-7 for 6 days and stimulated with PMA/ionomycin for 4 hours as described in  
907 methods. (a) Live CD4<sup>+</sup> T cells were gated on different memory subsets based on CD161  
908 expression (left) and the proportion of CD161<sup>+</sup> cells within CD4<sup>+</sup>CD45RO<sup>+</sup>CCR6<sup>+</sup> subset is  
909 shown for each subject (right). (b) Intracellular expression of IL-17 and IFN $\gamma$  within  
910 CD4<sup>+</sup>CCR6<sup>+</sup>CD161<sup>+</sup> and CD4<sup>+</sup>CCR6<sup>+</sup>CD161<sup>-</sup> T cell subsets. (c) The frequencies of IL-17 and  
911 IFN $\gamma$  expressing cells within CD4<sup>+</sup>CD45RO<sup>+</sup>CCR6<sup>+</sup>CD161<sup>+</sup> and (d)  
912 CD4<sup>+</sup>CD45RO<sup>+</sup>CCR6<sup>+</sup>CD161<sup>-</sup> cells were calculated and shown for individual study  
913 participants. (e) Analysis of IFN $\gamma$ +IL4<sup>-</sup> (Th1 cells) and IFN $\gamma$ - IL4<sup>+</sup> (Th2 cells) in memory CD4<sup>+</sup>  
914 cells after day 1 (d1) in culture in IL-7, and ratio of Th1 to Th2 cells. Data from healthy controls  
915 (n = 90) and ME/CFS patients (n = 196) for a (right), from Healthy (n = 87) and ME/CFS (n =  
916 191) for c and d, from Healthy (n = 90) and ME/CFS (n = 198) for e, and groups were compared  
917 by Mann-Whitney test for non-parametric data, with exact p-values and average (AVG) and  
918 median (MED) values are shown. Correlations of data were performed using nonparametric  
919 Spearman correlation, with exact  $r_s$  and p value shown.  
920

921 **Figure 6. Perturbation of Mucosal Associated Invariant T (MAIT) cell subsets in ME/CFS**  
922 **PBMC.** (a) MAIT cell subset frequencies were identified based on the co-expression of CD161  
923 and V $\alpha$ 7.2, after gating within CD4+, CD8+ and CD4-CD8- (DN) T cells (b) Analysis of the  
924 proportion of MAIT cells in each of these T cell subsets on day 0 (d0) and (c) 6 days (d6) in  
925 culture with IL-7. (d) Ratio of day 0 to day 6 MAIT cells was calculated for individual study  
926 participants. (e) The ratio of CD8+ MAIT to DN MAIT cells was calculated for day 0 (left) and  
927 day 6 (right). (f) Surface expression of CD27 was determined after gating for CD8+ MAIT and  
928 DN MAIT cell subsets as shown. (g) Analysis of the proportion of CD45RO+CD27- within  
929 CD8+ MAIT and DN MAIT cells in PBMC of ME/CFS and control subjects. Groups were  
930 compared by Mann-Whitney test for non-parametric data, with exact p values, average (AVG)  
931 and median (MED) values are shown. (h) The ratio of MAIT cell subset (CD8+ or DN  
932 separately) frequency at day 0 to day 6, was correlated with CD27- MAIT cell frequency (of  
933 total CD8+ MAIT cells). Data from healthy controls (Healthy, n = 91) and ME/CFS patients  
934 (ME/CFS, n = 190) for b, from Healthy (n = 90) and ME/CFS (n = 195) for c (left and middle),  
935 from Healthy (n = 90) and ME/CFS (n = 196) for c (right), from Healthy (n = 90) and ME/CFS  
936 (n = 186) for d (left), from Healthy (n = 90) and ME/CFS (n = 190) for d (middle), from Healthy  
937 (n = 90) and ME/CFS (n = 189) for d (right), from Healthy (n = 91) and ME/CFS (n = 190) for e  
938 (left), from Healthy (n = 90) and ME/CFS (n = 196) for e (right), from Healthy (n = 91) and  
939 ME/CFS (n = 190) for g, from Healthy (n = 90) and ME/CFS (n = 184) for h (left), from Healthy  
940 (n = 60) and ME/CFS (n = 108) for h (right), and groups were compared by Mann-Whitney test  
941 for non-parametric data, with exact p-values and average (AVG) and median (MED) values are  
942 shown. Correlations of data were performed using nonparametric Spearman correlation, with  
943 exact  $r_s$  and p value shown.

944  
945 **Figure 7. Activation of MAIT cell effector functions.** (a) PBMC were stimulated with  
946 combination of the cytokines IL-12+IL-15+IL-18 for 1 day as described in methods, and  
947 intracellularly stained for IFN $\gamma$  and Granzyme A expression, which was analyzed after gating on  
948 MAIT (CD161+V $\alpha$ 7.2+) and non-MAIT (CD161-V $\alpha$ 7.2-) CD8+ T cells. (b) Proportion of IFN $\gamma$   
949 and (c) Granzyme A in CD8+ MAIT and non-MAIT cells from ME/CFS and control subjects.  
950 (d) The frequency of CD8+CD45RO+CD27- MAIT cells was correlated to CD8+ MAIT and  
951 non-MAIT IFN $\gamma$ + cells after stimulation with cytokine combination. Groups were compared by  
952 nonparametric Spearman correlation, with exact  $r_s$  and p value shown in figures. (e) PBMC  
953 were cultured in IL-7 for 6 days (d6) then stimulated with PMA and Ionomycin as described in  
954 methods. Frequency of IFN $\gamma$  and IL-17A expression within MAIT and non-MAIT CD8+ T cells  
955 were compared between patient and control groups. (f) IFN $\gamma$  and TNF $\alpha$  expression, after  
956 activation, in CD8+ MAIT, and CD8+CD45RO+ non-MAIT memory T cells. (g) Expression of  
957 IFN $\gamma$  or IL-17+IFN $\gamma$  cells within CD8+ MAIT cells in ME/CFS and control subjects. (h)  
958 Proportion of CD8+ or CD8+ memory (gated on CD45RO+) cells expressing IFN $\gamma$ . Data from  
959 healthy controls (Healthy, n = 91) and ME/CFS patients (ME/CFS, n = 198) for b and c, from  
960 Healthy (n = 91) and ME/CFS (n = 185) for d (left), from Healthy (n = 91) and ME/CFS (n =  
961 191) for d (right), from Healthy (n = 91) and ME/CFS (n = 188) for g (left), from Healthy (n =  
962 90) and ME/CFS (n = 183) for g (right), from Healthy (n = 90) and ME/CFS (n = 196) for h, and  
963 groups were compared by Mann-Whitney test for non-parametric data, with exact p-values,  
964 average (AVG) and median (MED) values are shown. Correlations of data were performed using  
965 nonparametric Spearman correlation, with exact  $r_s$  and p value shown.

966



967 **Figure 8. Regulatory T (Treg) cell frequency in ME/CFS.** (a) PBMC were stained with Foxp3  
 968 and Helios intracellularly and expression was analyzed after gating on CD4+ naïve  
 969 (CD27+CD45RO-) and memory (CD45RO+) T cells as described in the methods. (b)  
 970 Proportions of Tregs (Foxp3+Helios+) were calculated within CD4+ naïve and memory subsets  
 971 in ME/CFS and healthy subjects. (c) CD4+ naïve and memory Tregs divided into two groups  
 972 based on age younger and older than 50 years in all subjects. (d) Correlation of CD4+ naïve and  
 973 memory Treg subset frequencies with subject age. (e) Correlation between Th17 cells and  
 974 memory Tregs was performed by nonparametric Spearman correlation, with exact  $r_s$  and p-value  
 975 shown. The ratio of IL-17-expressing cells within Th17 subset (CCR6+) to memory Tregs were  
 976 compared between ME/CFS subjects and controls. Data from healthy controls (Healthy, n = 91)  
 977 and ME/CFS patients (ME/CFS, n = 197) for b, c, and d, from Healthy (n = 80) and ME/CFS (n  
 978 = 197) for e, and groups compared by the Mann-Whitney test for non-parametric data, with exact  
 979 p value, average (AVG) and median (MED) values are shown. Correlations of data were  
 980 performed using nonparametric Spearman correlation, with exact  $r_s$  and p value shown.

981  
 982 **Figure 9. Random forest clustering of immune features in ME/CFS and control subjects.**  
 983 To generate a receiver operating characteristic (ROC) curve using random forest (RF) clustering  
 984 algorithm, a training set with 231 samples (80% of total samples) was selected and the remaining  
 985 data, corresponding to 58 samples (20% of total samples), was left as the test set. Missing values  
 986 in the training and test sets were replaced by the corresponding median value in the training set.  
 987 A K-fold cross-validation method was used (K=3) to tune the hyperparameters of the model and  
 988 was trained using a distinct set of features as input; all 65 immune profile features, the 40  
 989 significantly different features, the top 10 significantly different features and the top 10 features  
 990 that received the highest importance score are plotted.

991  
 992

## 993 Tables

994  
 995 **Table I: Metrics of the RF classifier using different numbers of immune profile features.**  
 996 The sensitivity (recall), specificity, positive predictive value (precision), negative predictive  
 997 value, accuracy and  $F_1$  score of immune features are shown. Detailed explanation of these  
 998 metrics and formulas to calculate them are given in methods section. The rows represent the  
 999 metrics of: 1) RF classifier when all 65 features are used, 2) for 40 significantly different  
 1000 immune features, 3) the 10 features with the highest importance score among the 40 significantly  
 1001 different immune parameters, and 4) the RF classifier when the top 10 significantly different  
 1002 features are used.

1003

| Number of features | Sensitivity | Specificity | Positive pred. value | Negative pred. value | Accuracy | $F_1$ score | AUC   |
|--------------------|-------------|-------------|----------------------|----------------------|----------|-------------|-------|
| 65 total set       | 0.950       | 0.611       | 0.844                | 0.846                | 0.845    | 0.894       | 0.929 |
| 40 significant     | 0.900       | 0.722       | 0.878                | 0.765                | 0.845    | 0.889       | 0.915 |
| 10 important       | 0.925       | 0.556       | 0.822                | 0.769                | 0.810    | 0.871       | 0.879 |
| 10 significant     | 0.825       | 0.722       | 0.868                | 0.650                | 0.793    | 0.846       | 0.815 |



Figure 1

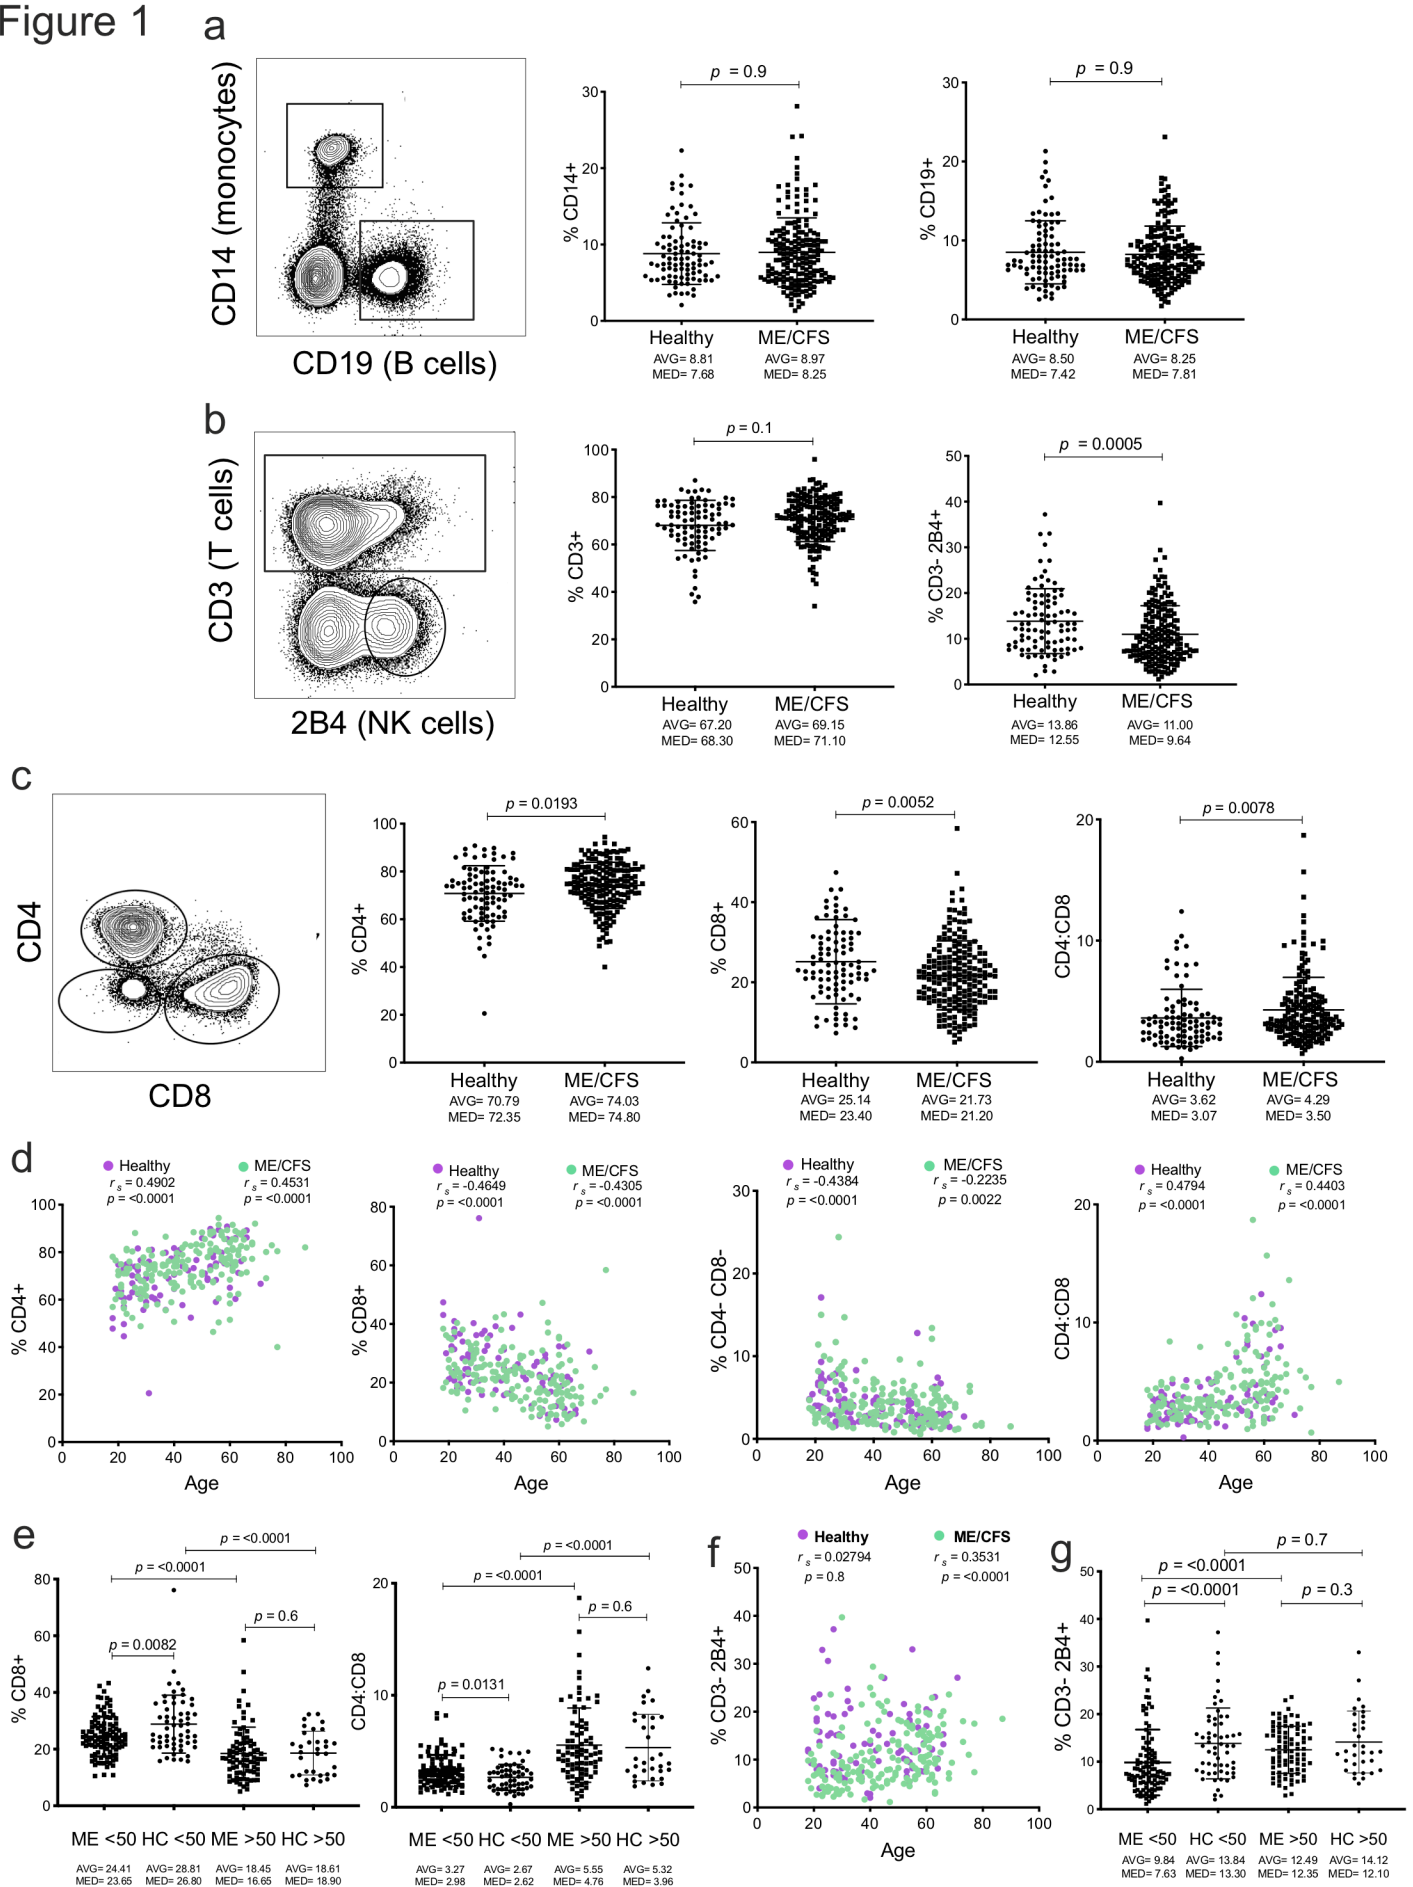

Figure 2

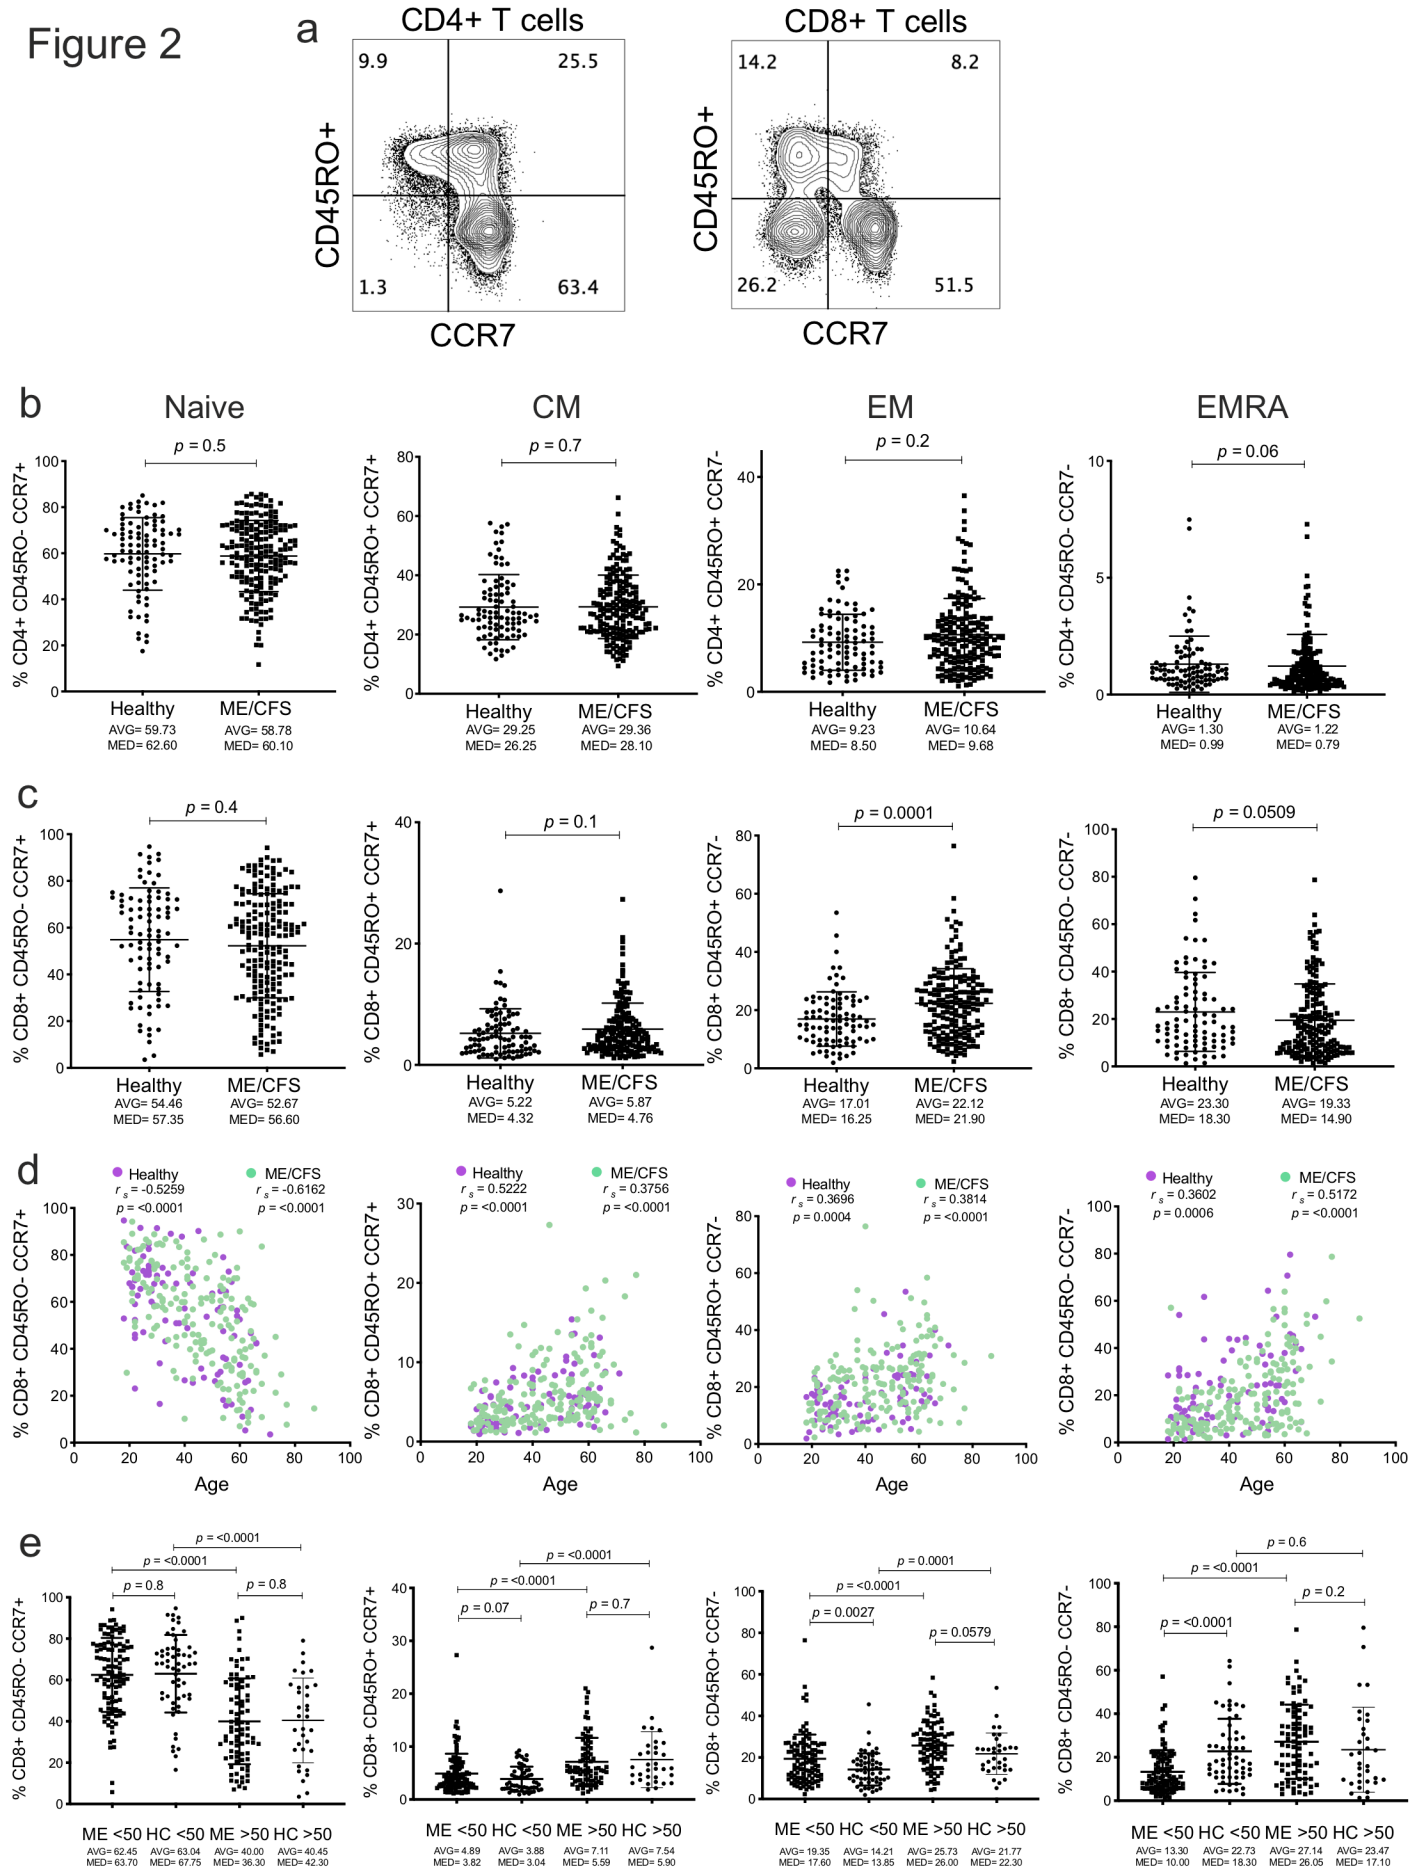

Figure 3

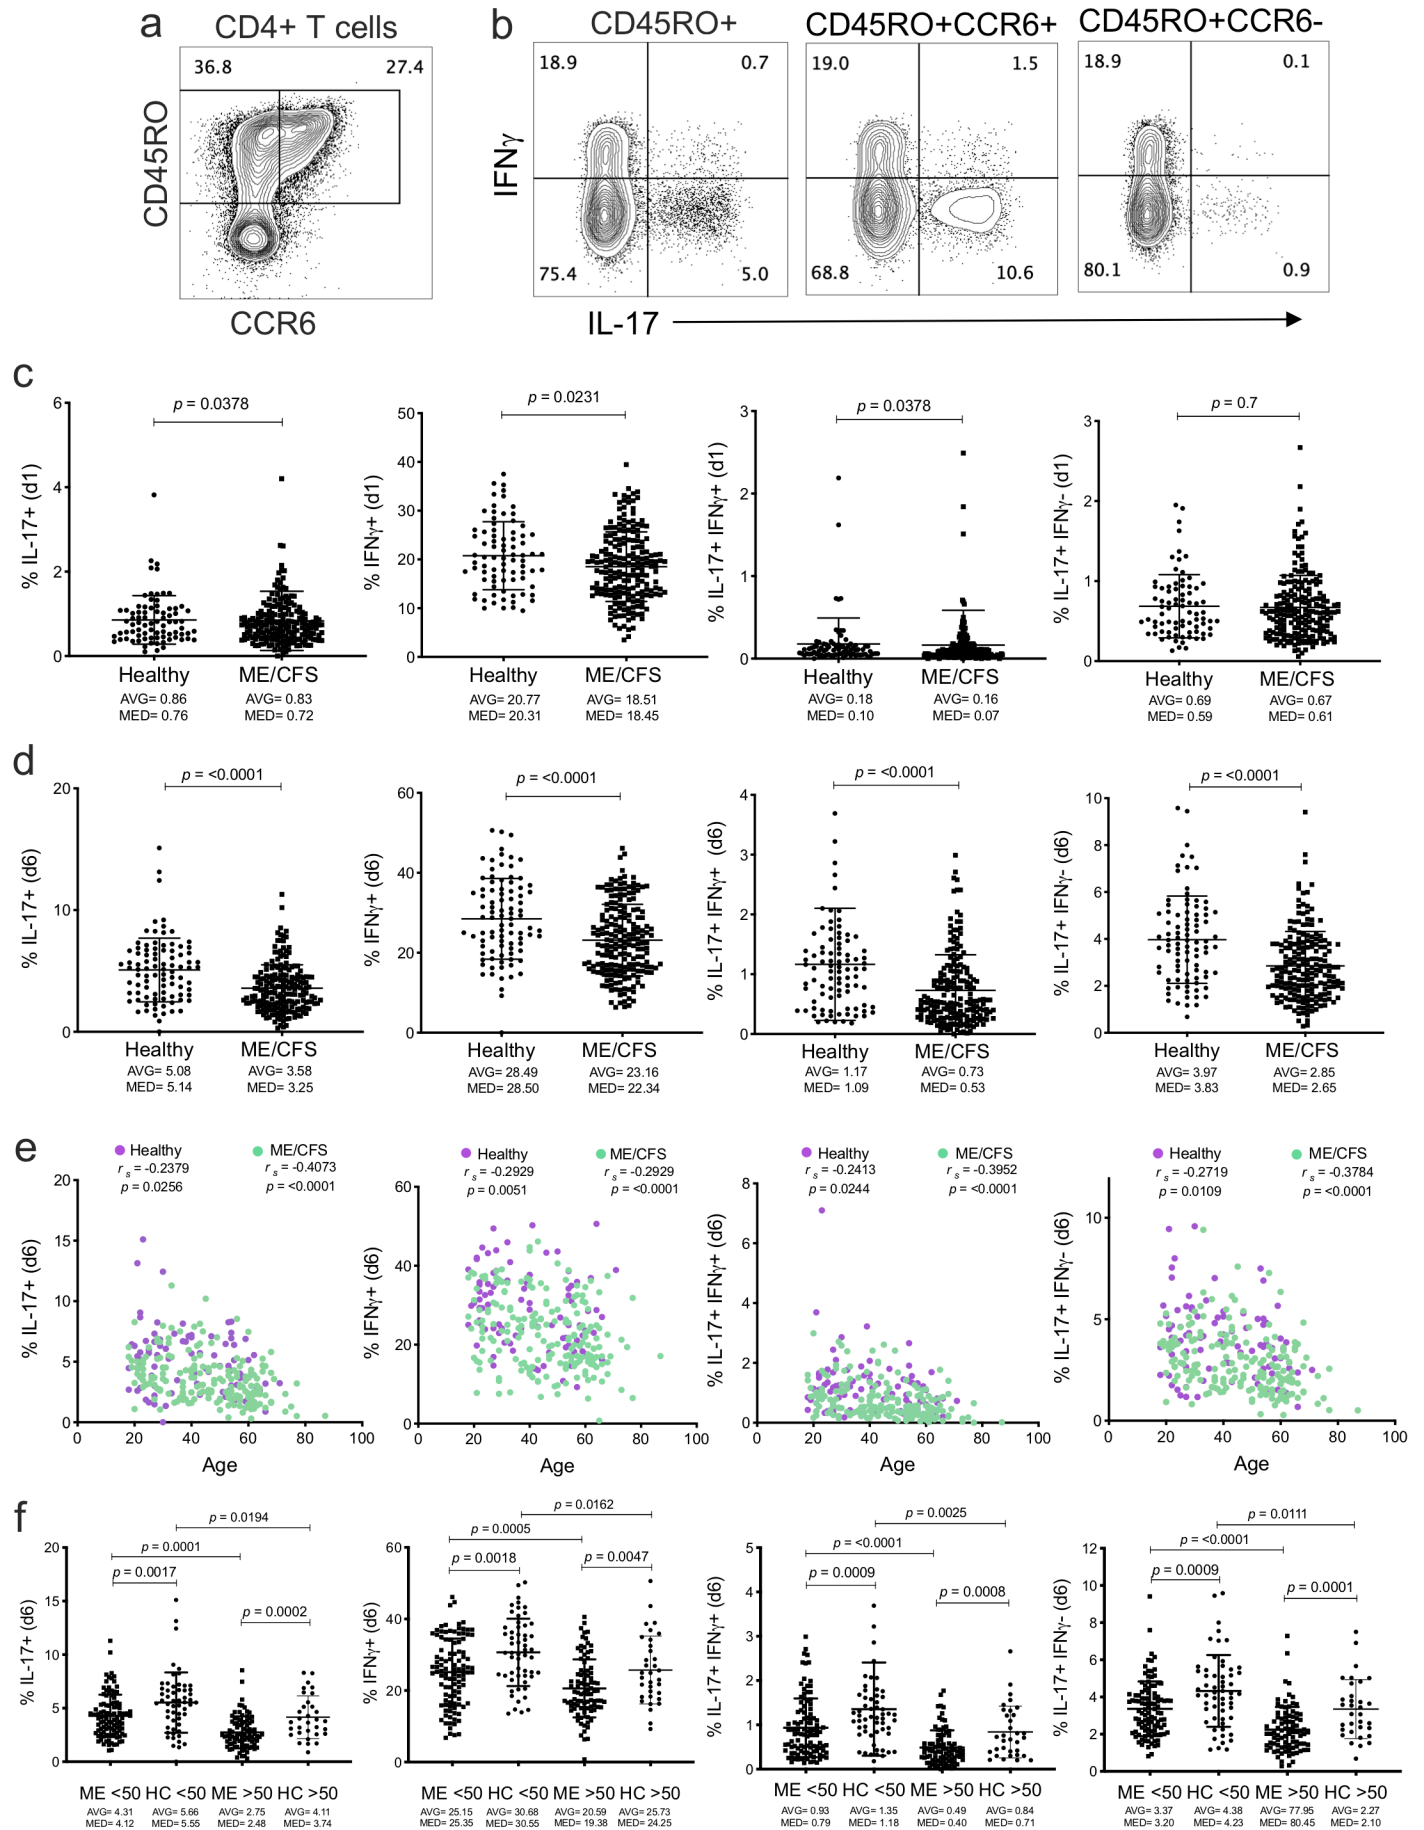



## Figure 4

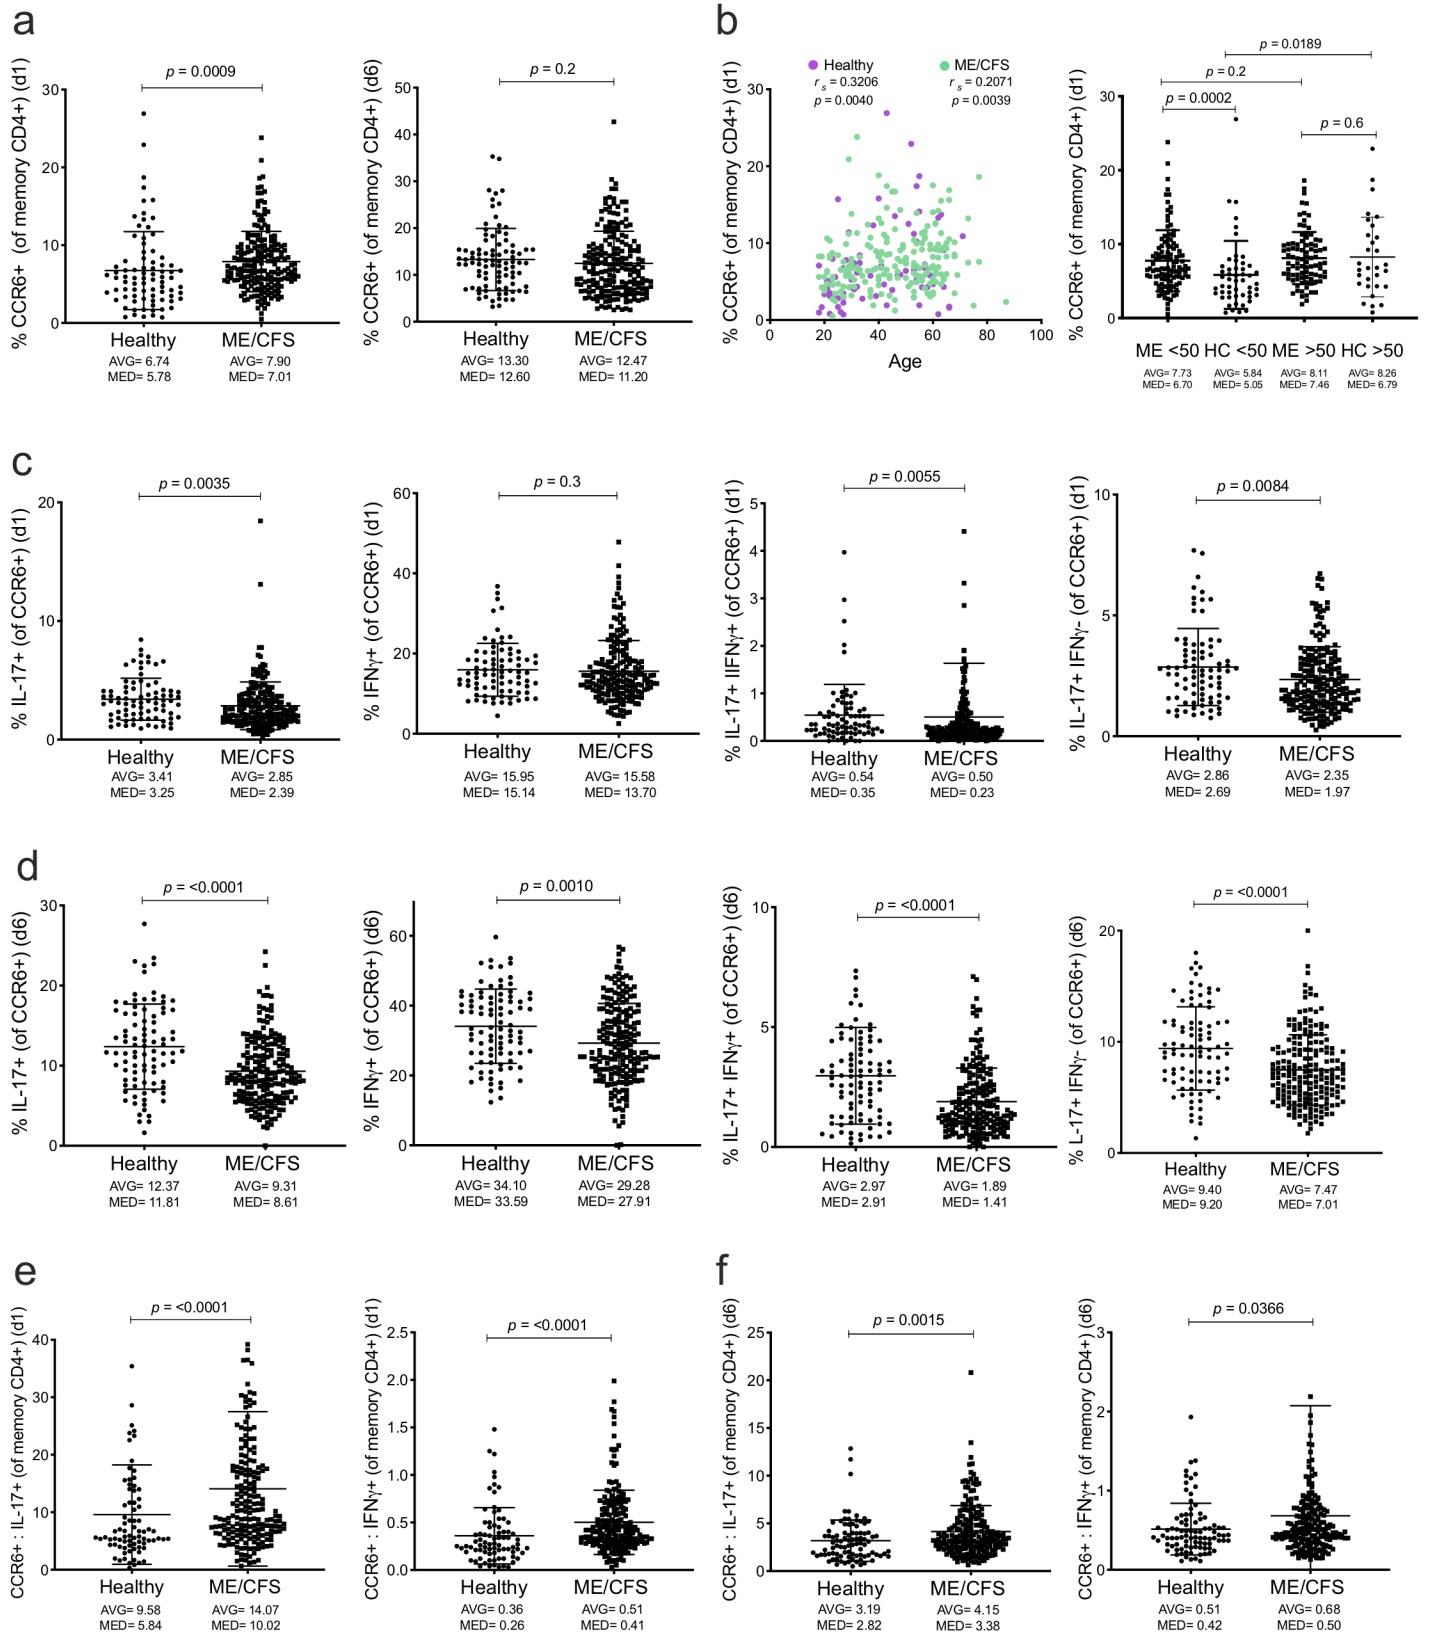

Figure 5

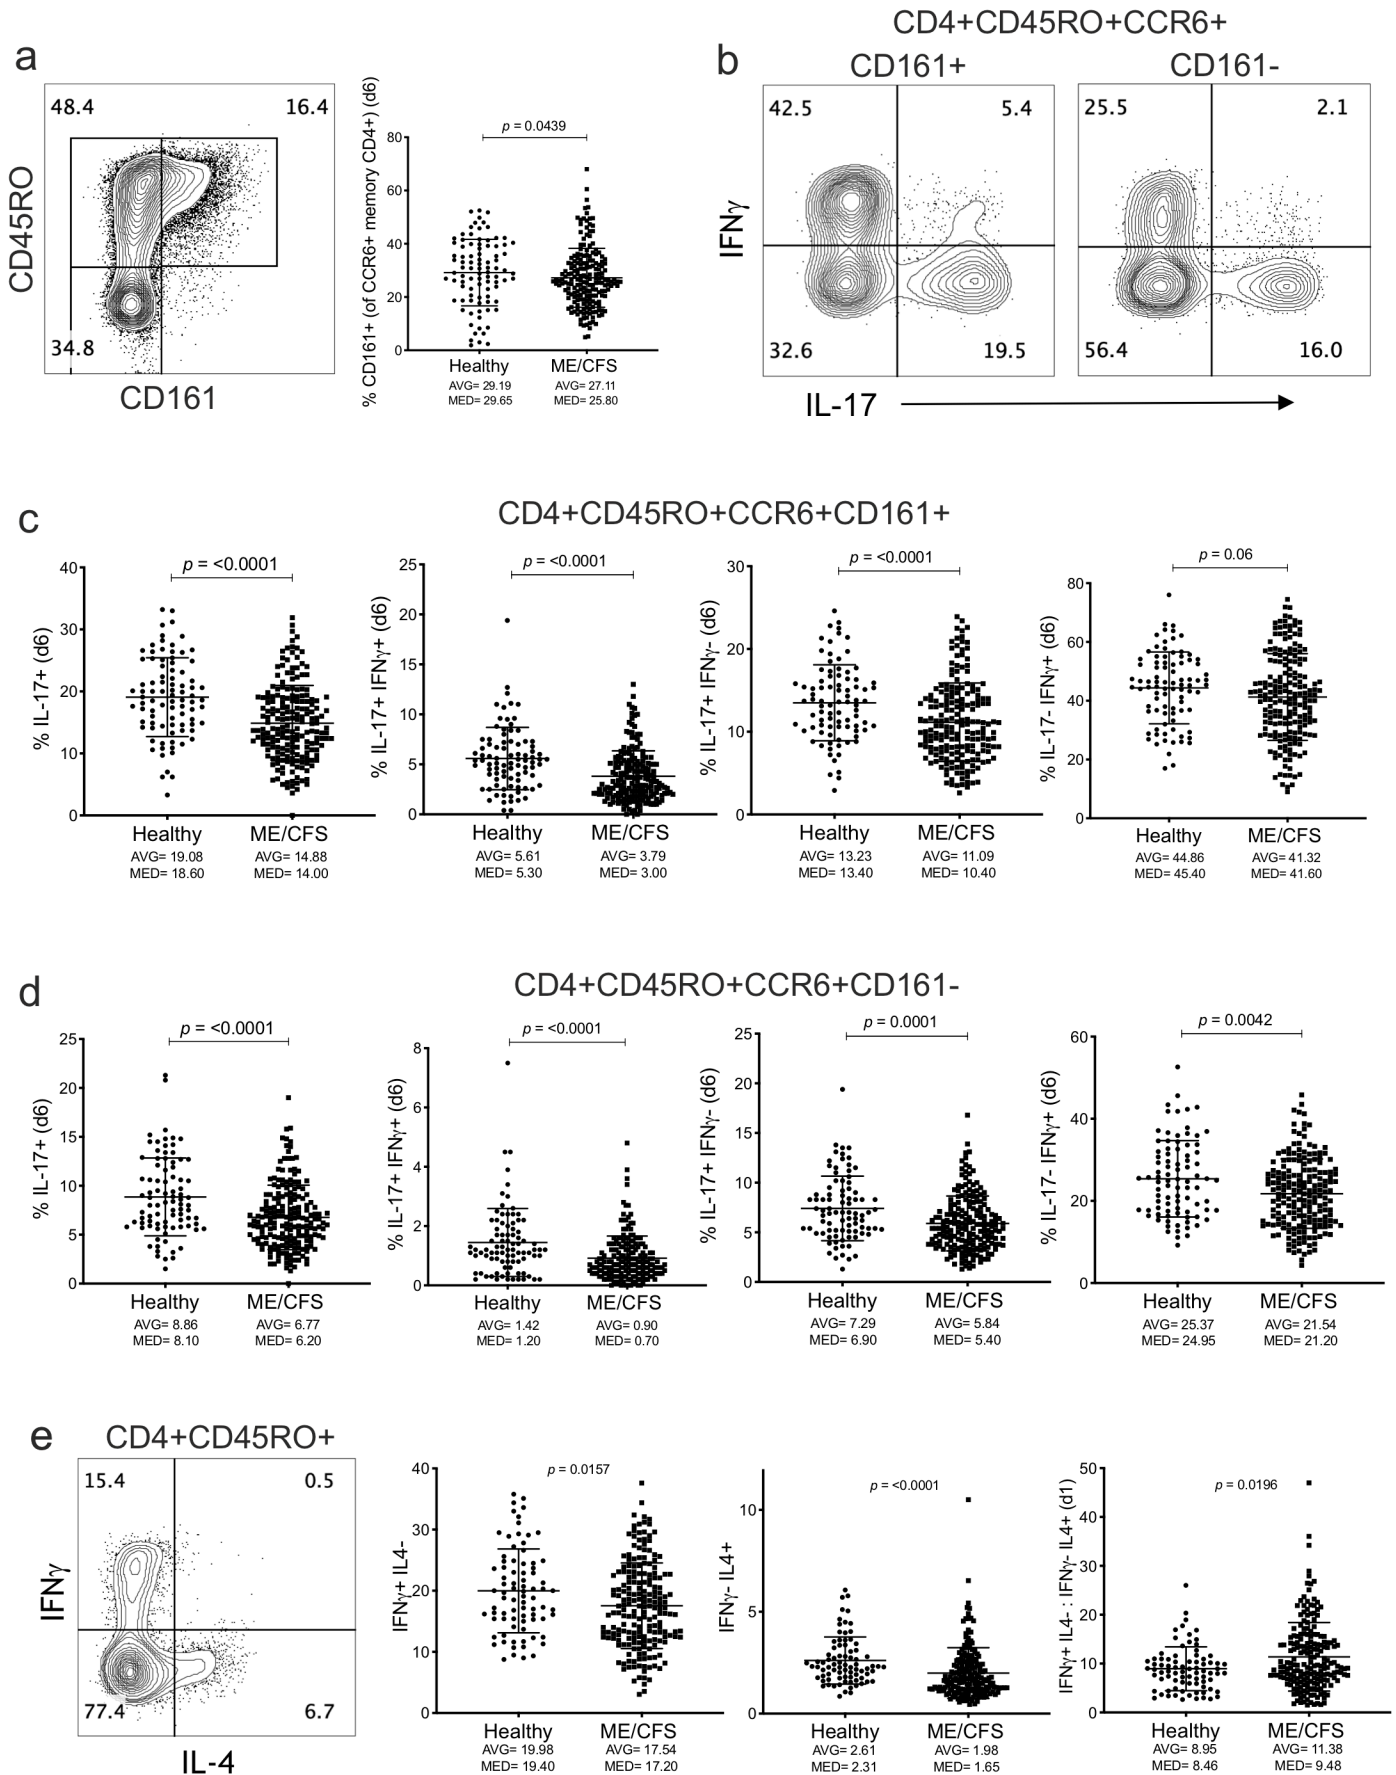

Figure 6 (a-d)

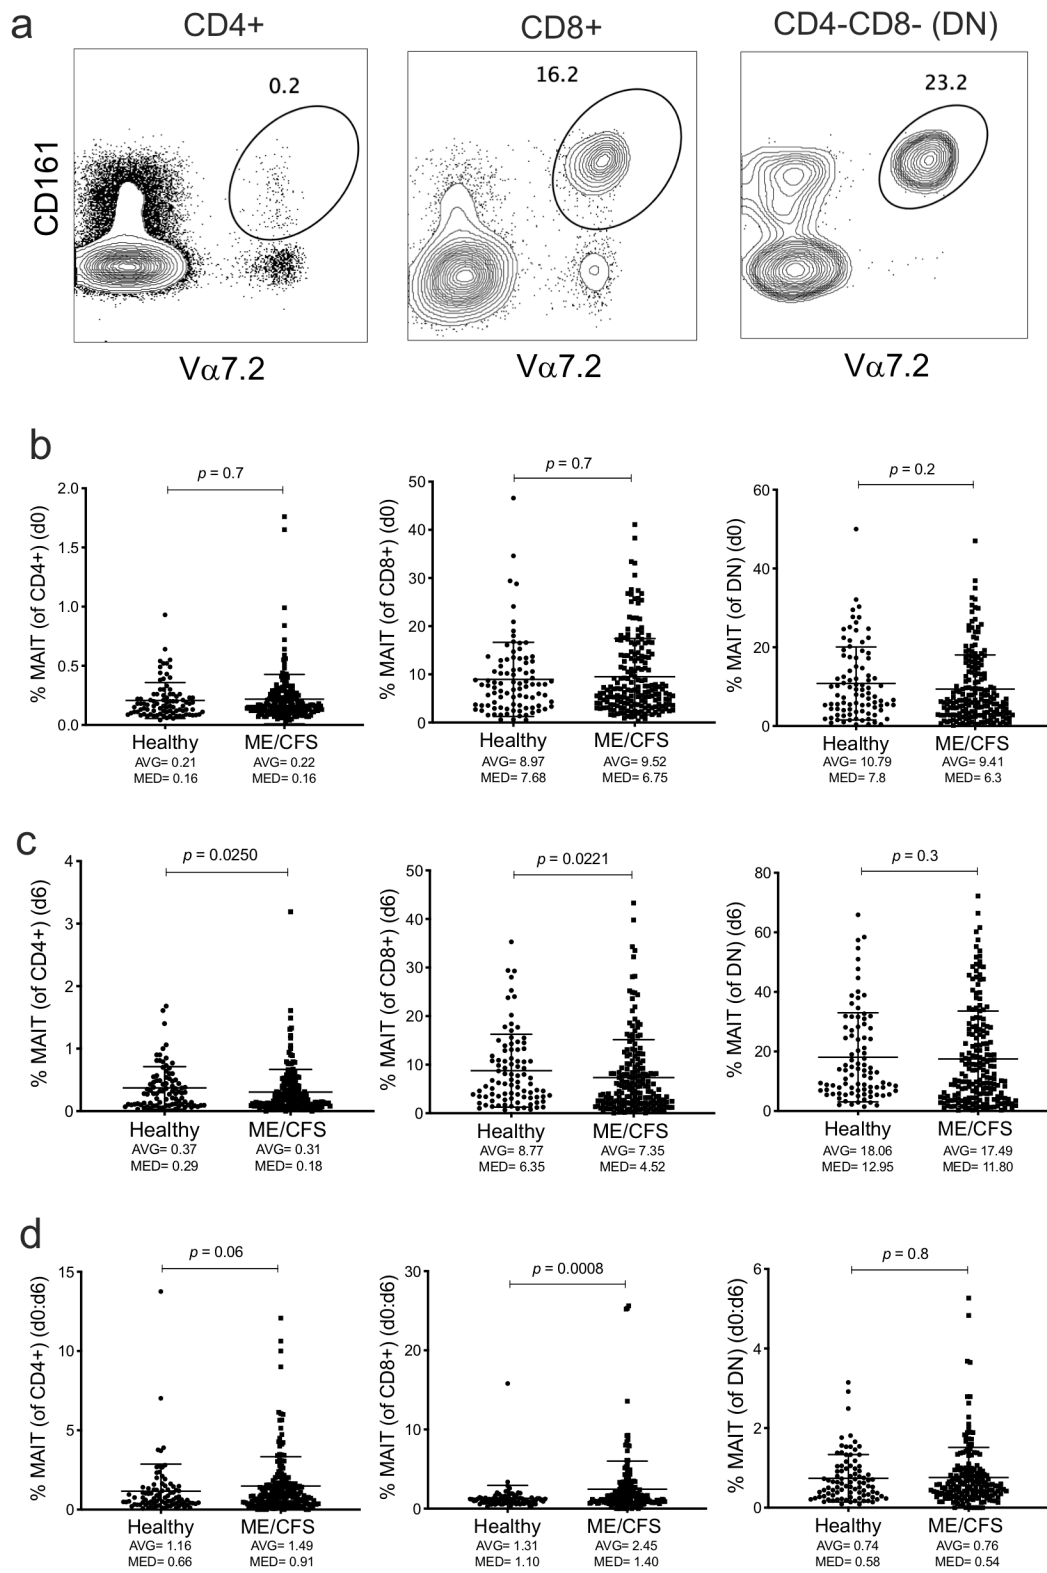

Figure 6 (e-h)

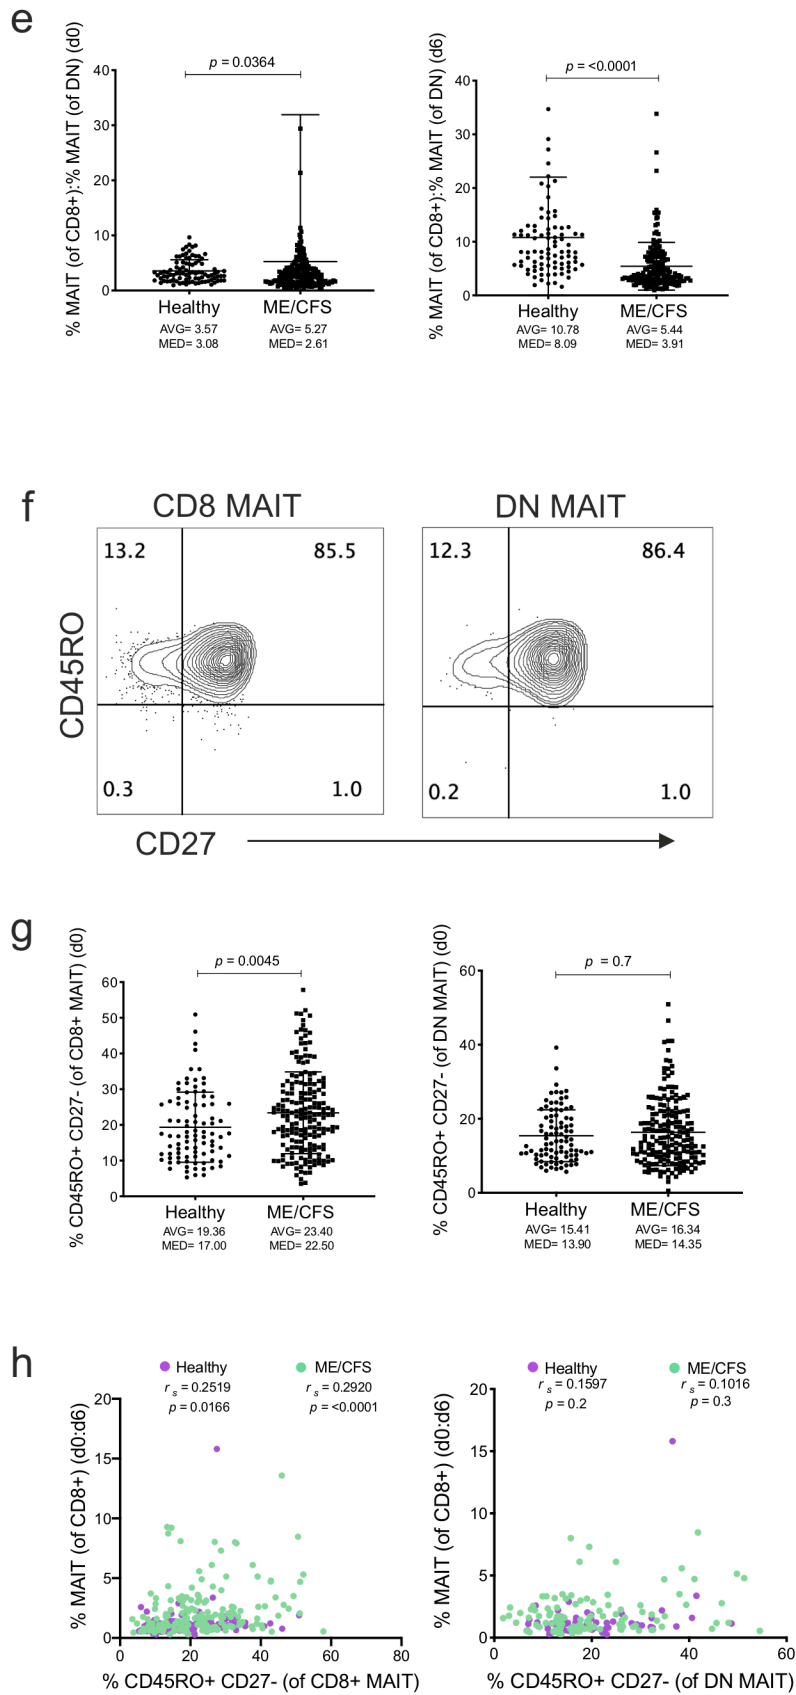

Figure 7 (a-d)

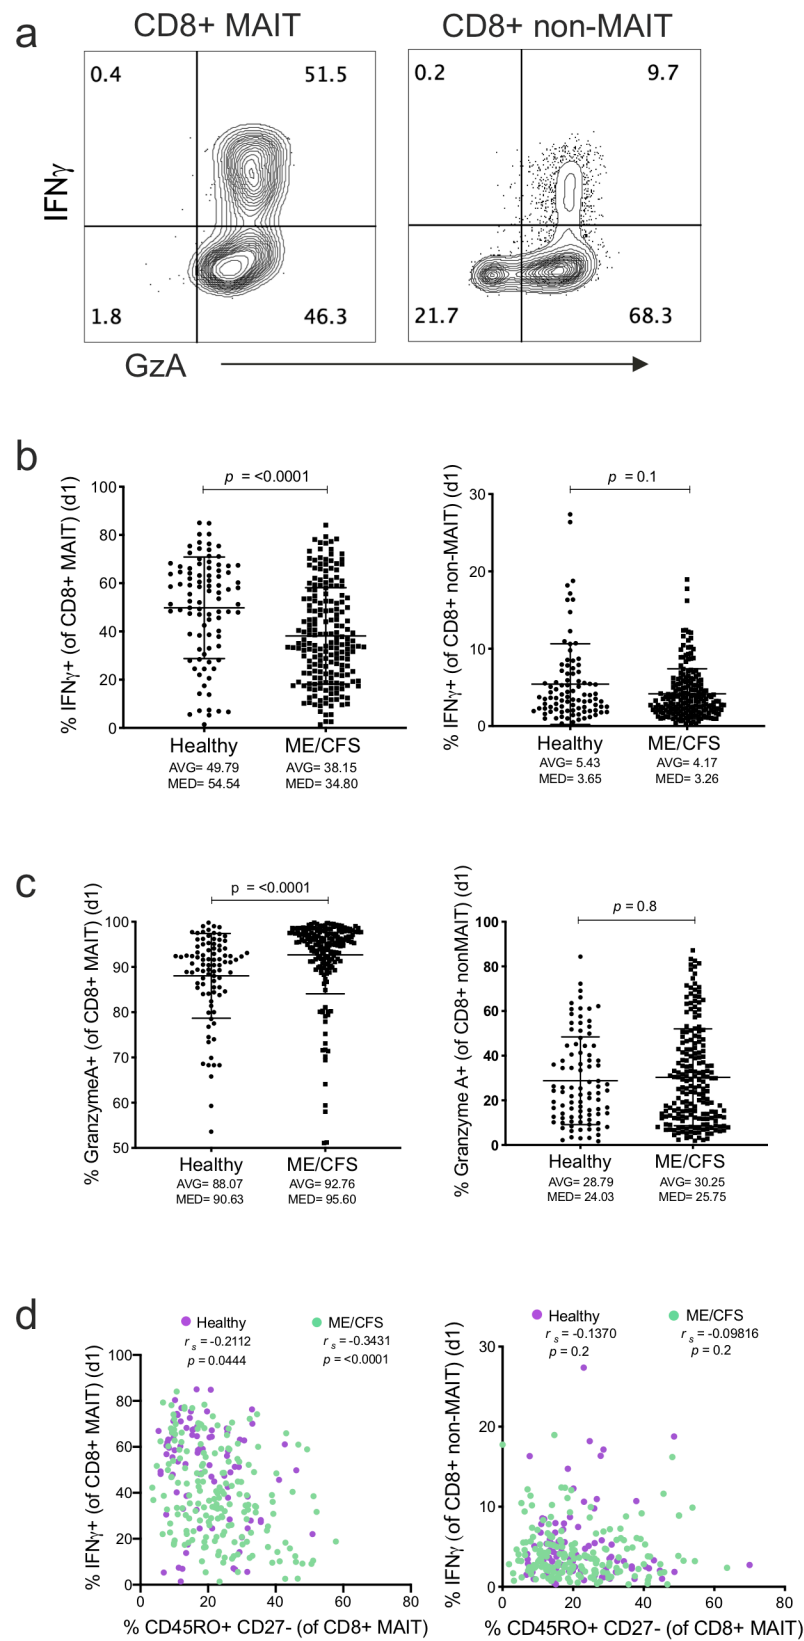



Figure 7 (e-h)

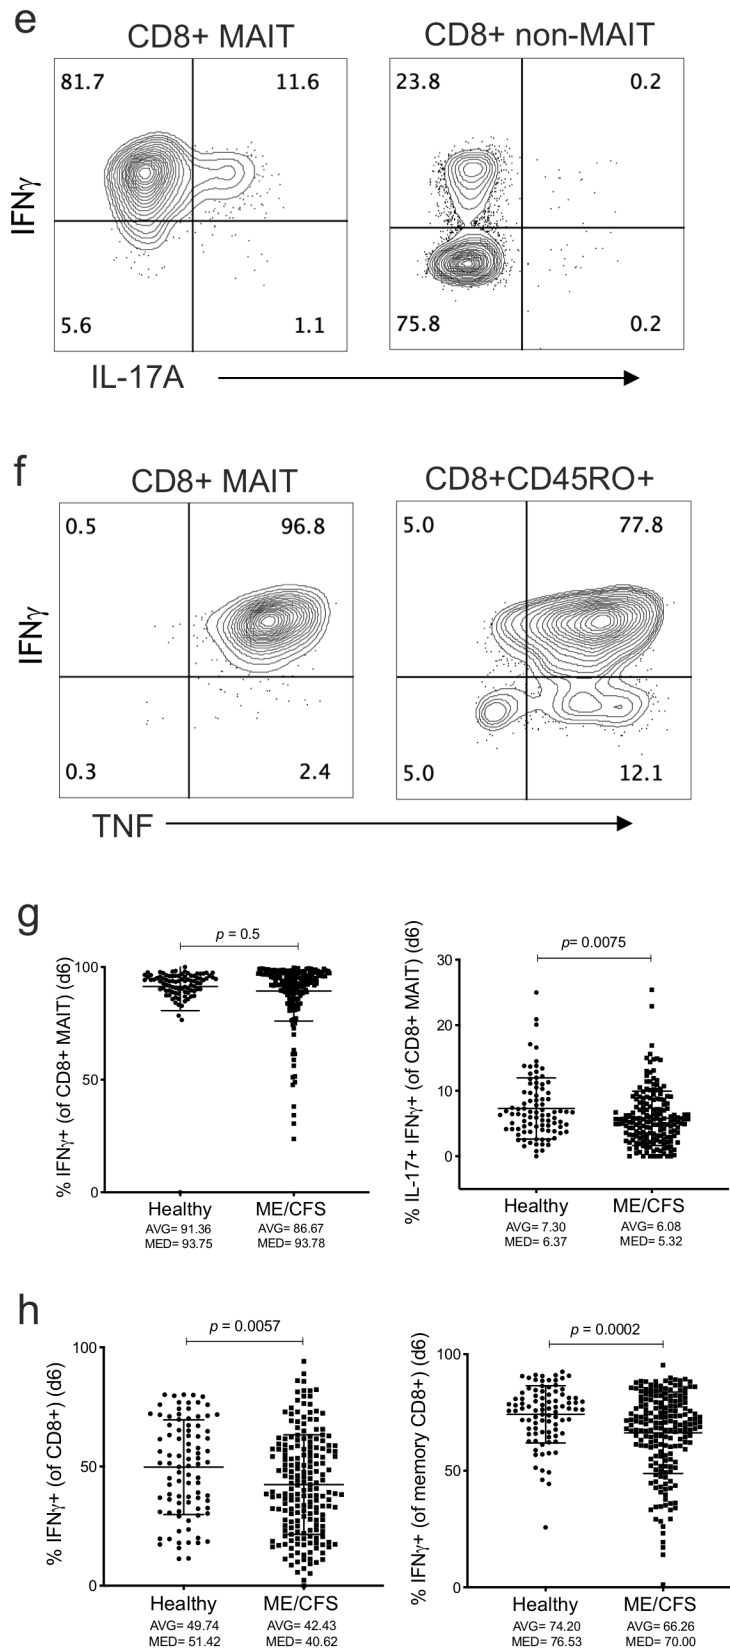

Figure 8

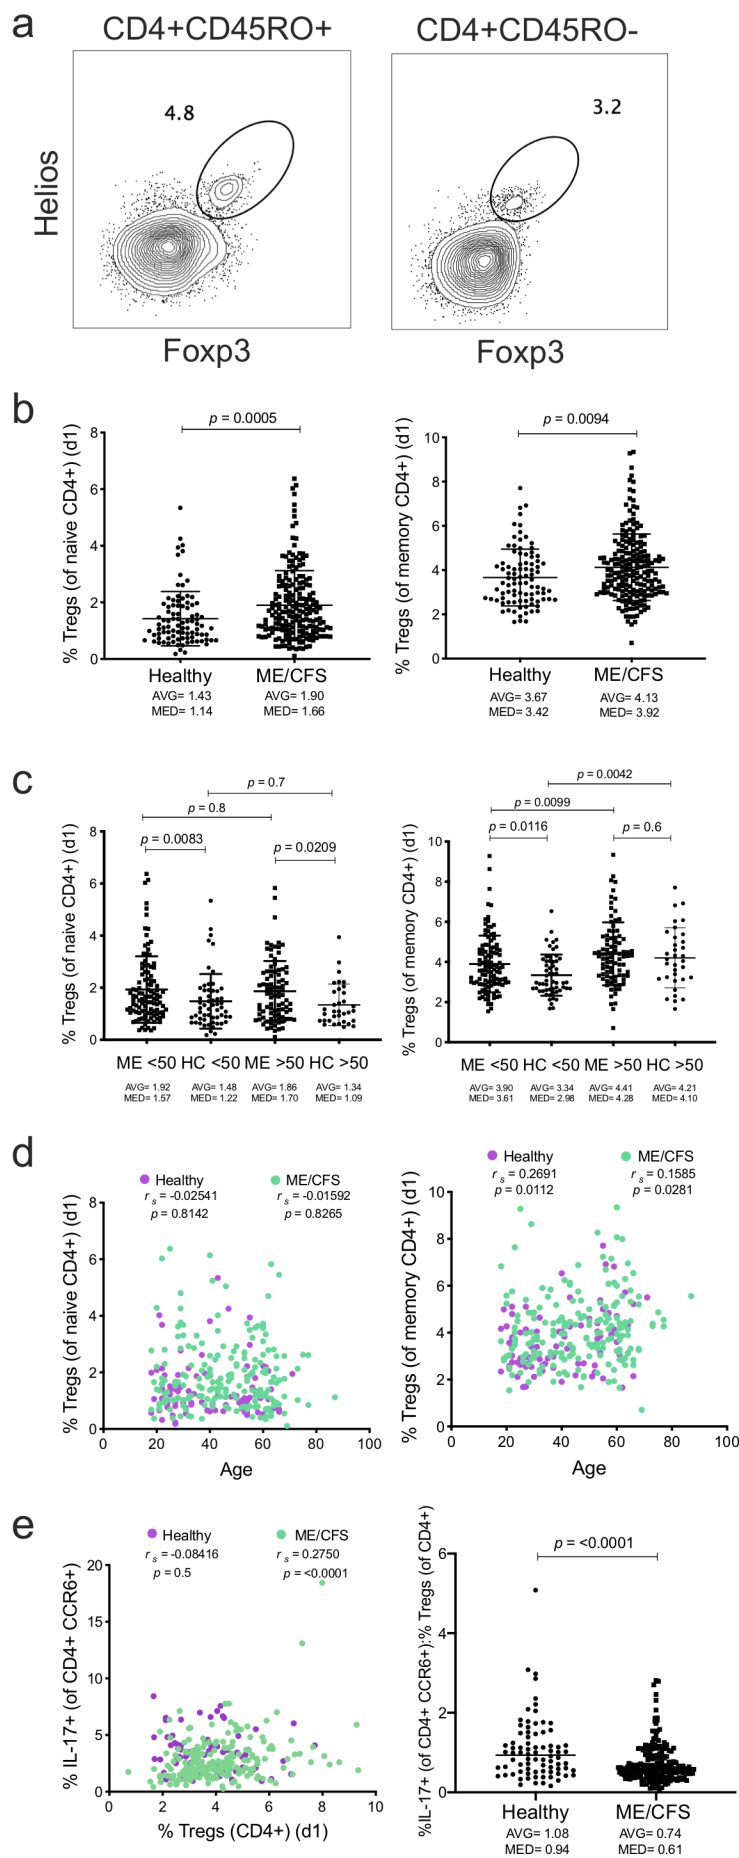

Figure 9

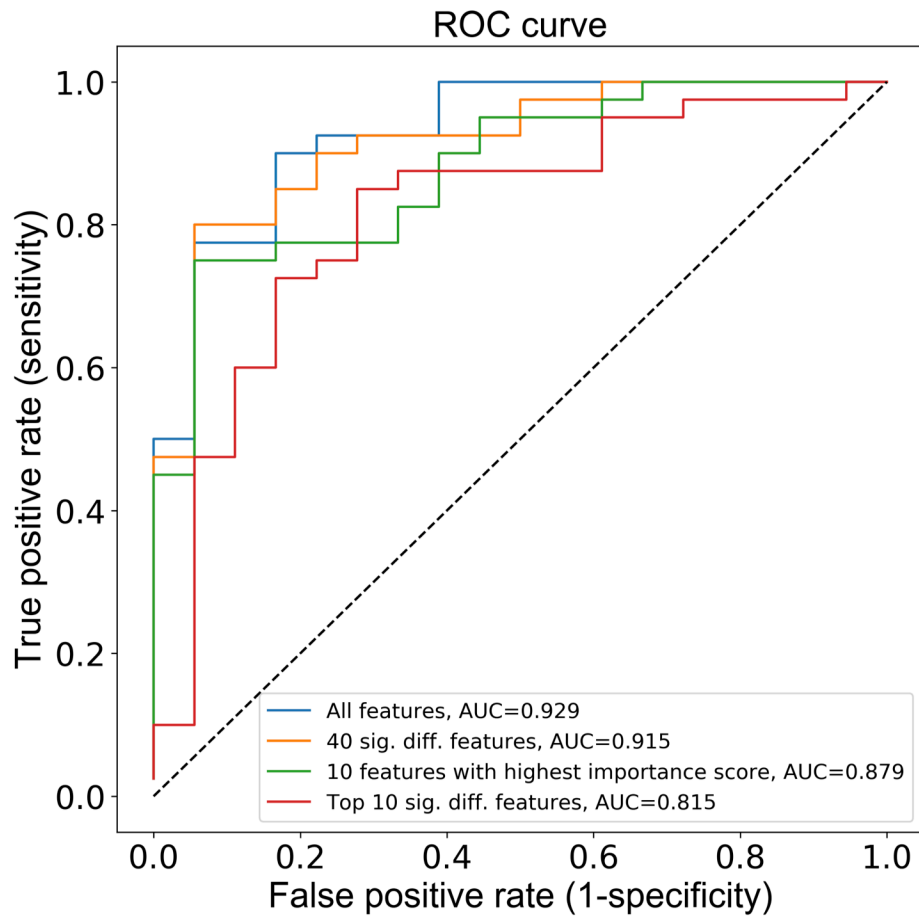

Source: https://www.biorxiv.org/content/biorxiv/early/2019/12/26/2019.12.23.887505.full.pdf
